# Supplementary material for: Approaching Inflammation Paradoxes—Proinflammatory Cytokine Blockages Induce Inflammatory Regulators
Source: PubMed Central journal article supplement (PMC7604447; doi:10.3389/fimmu.2020.554301), 2020-10-19
Supplement: Image_1.pdf [file Image_1.pdf]

## *Supplementary Material.*

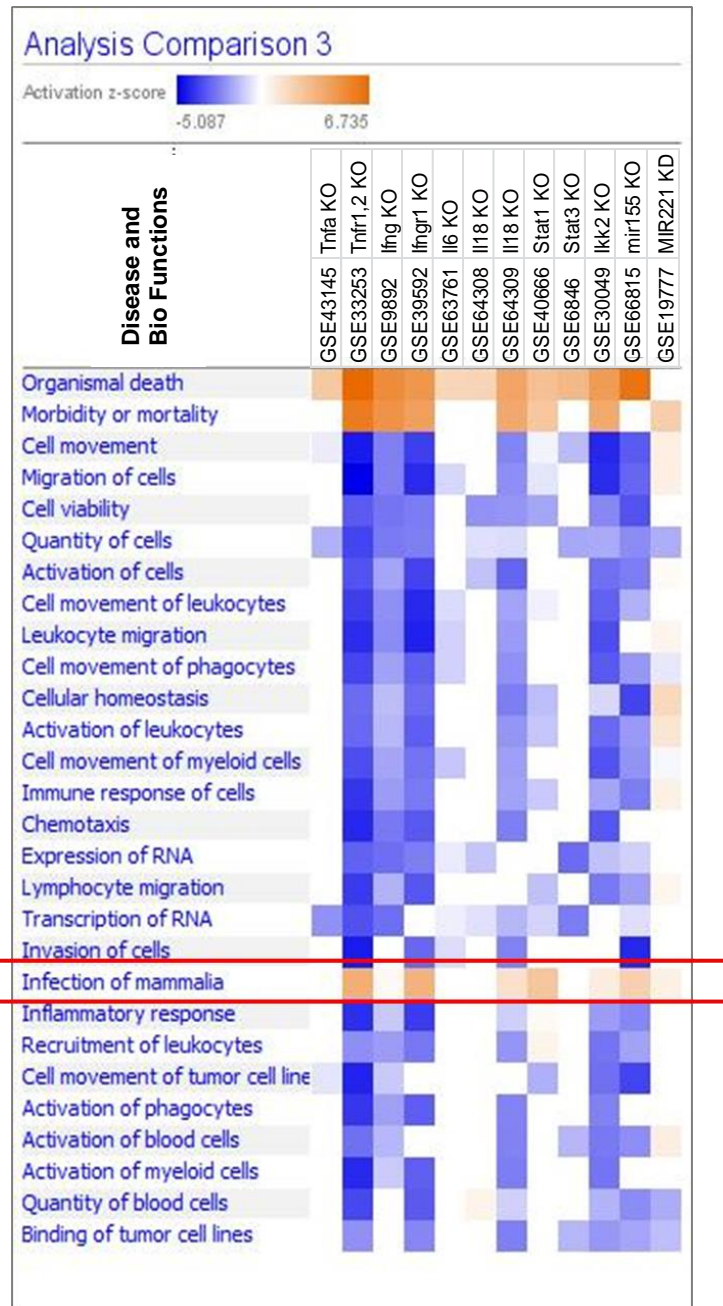

**Supplementary Figure 1** The heatmap of diseases related to downregulated IGs from IPA analysis comparison. The result showed downregulated IGs were associated with increased infection of mammalia. KO, knock out; KD, knock down. ( $P$ .value<0.05)
