# Supplementary material for: Approaching Inflammation Paradoxes—Proinflammatory Cytokine Blockages Induce Inflammatory Regulators
Source: Front Immunol. 2020 Oct 19;11:554301. doi: 10.3389/fimmu.2020.554301 (PMC7604447; doi:10.3389/fimmu.2020.554301)
Supplement: Supplementary Table S8 — IPA results of down-regulated innatomic genes in deficiencies of proinflammatory cytokines and regulators. (∣Z score∣> 2) [file Table_8.xlsx]

## Sheet: S8 down-regulated IGs IPA
GSE NO.	Method	Ingenuity Canonical Pathways	-log(p-value)	Ratio	z-score	Molecules	GSE NO.	Method	Ingenuity Canonical Pathways	-log(p-value)	Ratio	z-score	Molecules	GSE NO.	Method	Ingenuity Canonical Pathways	-log(p-value)	Ratio	z-score	Molecules	GSE NO.	Method	Ingenuity Canonical Pathways	-log(p-value)	Ratio	z-score	Molecules	GSE NO.	Method	Ingenuity Canonical Pathways	-log(p-value)	Ratio	z-score	Molecules	GSE NO.	Method	Ingenuity Canonical Pathways	-log(p-value)	Ratio	z-score	Molecules	GSE NO.	Method	Ingenuity Canonical Pathways	-log(p-value)	Ratio	z-score	Molecules	GSE NO.
GSE33253	Tnfr1,2 KO	Activation of IRF by Cytosolic Pattern Recognition Receptors	13.4	0.19	-2.309	CD40,DDX58,DHX58,IFIH1,IL6,IRF7,IRF9,NFKB2,NFKBIE,STAT1,STAT2,TNF	GSE9892	Ifng KO	Interferon Signaling	14.3	0.278	-2.53	BAK1,IFI35,IFIT3,IRF1,OAS1,PSMB8,SOCS1,STAT1,STAT2,TAP1	GSE39592	Ifngr1 KO	Interferon Signaling	10.6	0.194	-2.449	IFITM3,IFNGR1,IRF1,IRF9,PSMB8,STAT1,TAP1	GSE64309	Il18 KO	Toll-like Receptor Signaling	4.56	0.0526	-2	IL18,IL1RN,MAP2K6,TLR3	GSE30049	Ikk2 KO	Osteoarthritis Pathway	4.95	0.0318	-2.646	CASP1,CASP4,EPAS1,ITGA2,MMP13,NOS2,TNFRSF1B	GSE40666	Stat1 KO	Interferon Signaling	19.3	0.25	-2.121	IFI35,IFIT3,IRF1,IRF9,OAS1,SOCS1,STAT1,STAT2,TAP1	GSE66815	mir155 KO	ILK Signaling	10	0.0576	-2.714	AKT1,CASP3,CCND1,HIF1A,IRS1,ITGB1,ITGB3,MAPK3,PARVA,PIK3CG,PIK3R1
		Systemic Lupus Erythematosus In B Cell Signaling Pathway	11.5	0.0655	-3.3	BCL2L11,BLNK,CD40,CD5,CSF2,IFIH1,IFIT3,IL6,IRF7,IRF9,ISG20,NFKB2,STAT1,STAT2,TLR3,TNF,TNFSF10,TRAF1			Systemic Lupus Erythematosus In B Cell Signaling Pathway	8.17	0.0464	-3.051	CD72,FOS,IFIH1,IFIT2,IFIT3,IL1B,IRF7,ISG20,RAP2A,STAT1,STAT2,TNFSF10,Tnfsf9			Neuroinflammation Signaling Pathway	10.4	0.0413	-3.051	ATP,CD40,CREB1,CXCL10,IFNGR1,IL12B,IL6,IRAK4,JUN,STAT1,TLR4,TLR7,VCAM1			Cholecystokinin/Gastrin-mediated Signaling	3.8	0.0336	-2	IL18,IL1RN,MAP2K6,SRC			PPAR Signaling	4.52	0.0481	2.236	IKBKE,IL1RN,NR1H3,PDGFB,TNFRSF1B			Activation of IRF by Cytosolic Pattern Recognition Receptors	6.16	0.0635	-2	IFIH1,IRF9,STAT1,STAT2			HGF Signaling	8.17	0.0721	-2.121	AKT1,CCND1,CDKN1A,ITGB1,MAPK3,PIK3CG,PIK3R1,PLCG1
		Interferon Signaling	11.3	0.25	-2.828	IFI35,IFIT3,IFITM3,IRF9,OAS1,PSMB8,STAT1,STAT2,TAP1			Osteoarthritis Pathway	7.36	0.0505	-3.162	ATP,CASP4,CEBPB,IL1B,ITGB1,MMP13,NAMPT,NOS2,PTGS2,SDC4,VEGFA			iNOS Signaling	9.64	0.146	-2.449	IFNGR1,IRAK4,IRF1,JUN,STAT1,TAB1,TLR4			Acute Phase Response Signaling	3.13	0.0223	-2	IL18,IL1RN,MAP2K6,SERPINE1			Acute Phase Response Signaling	4.41	0.0331	-2	C1R,CFB,IKBKE,IL1RN,Saa3,TNFRSF1B			Systemic Lupus Erythematosus In B Cell Signaling Pathway	4.93	0.0182	-2.236	IFIH1,IFIT3,IRF9,STAT1,STAT2			Neuroinflammation Signaling Pathway	7.95	0.0367	-3.317	AKT1,CASP3,CFLAR,MAPK3,MFGE8,MYD88,PIK3CG,PIK3R1,PLCG1,PSEN1,TLR1
		Role of Pattern Recognition Receptors in Recognition of Bacteria and Viruses	11	0.0909	-2.828	CSF2,DDX58,EIF2AK2,IFIH1,IL6,IRF7,NFKB2,OAS1,OAS2,OAS3,PTX3,TLR3,TNF,TNFSF10			Role of Pattern Recognition Receptors in Recognition of Bacteria and Viruses	6.65	0.0584	-2.236	EIF2AK2,IFIH1,IL1B,IRF7,NLRP3,OAS1,OAS3,TNFSF10,Tnfsf9			Dendritic Cell Maturation	7.97	0.0489	-2.828	CD40,CREB1,FCGR1A,IL12B,IL23A,IL6,STAT1,TAB1,TLR4			NF-κB Signaling	3.13	0.0223	-2	IL18,IL1RN,MAP2K6,TLR3			Type I Diabetes Mellitus Signaling	4.36	0.0446	-2	BID,FAS,IKBKE,NOS2,TNFRSF1B										NF-κB Activation by Viruses	7.72	0.0854	-2.646	AKT1,ITGA6,ITGB1,ITGB3,MAPK3,PIK3CG,PIK3R1
		TREM1 Signaling	9.62	0.133	-3.162	CD40,CSF2,CXCL3,ICAM1,IL6,ITGA5,NFKB2,PLCG1,TLR3,TNF			Neuroinflammation Signaling Pathway	6.65	0.0381	-2.887	ATP,CXCL10,FAS,FOS,GRINA,HLA-DMA,IL1B,IRF7,NLRP3,NOS2,PTGS2,STAT1			Systemic Lupus Erythematosus In B Cell Signaling Pathway	7.5	0.0357	-3.162	CD40,IFNGR1,IL12B,IL6,IRAK4,IRF9,ISG20,JUN,STAT1,TLR7			Dendritic Cell Maturation	3.09	0.0219	-2	IL15,IL18,IL1RN,TLR3			Cardiac Hypertrophy Signaling (Enhanced)	2.77	0.0141	-2.236	CSF2,EDN1,IKBKE,ITGA2,TNFRSF1B,TNFSF13B,Tnfsf9										Integrin Signaling	7.09	0.0421	-3	AKT1,ITGA6,ITGB1,ITGB3,MAPK3,PARVA,PIK3CG,PIK3R1,PLCG1
		Dendritic Cell Maturation	8.87	0.071	-3.606	CD40,CREB5,CSF2,ICAM1,IL1RN,IL6,NFKB2,NFKBIE,PLCG1,STAT1,STAT2,TLR3,TNF			Hepatic Fibrosis Signaling Pathway	5.81	0.0317	-2.309	CEBPB,FOS,IL1B,IL1RN,ITGB1,MAP2K7,MMP13,NFKBIA,RAP2A,RHOV,SERPINE1,VEGFA			Toll-like Receptor Signaling	6.66	0.0779	-2	IL12B,IRAK4,JUN,TAB1,TLR4,TLR7			Adrenomedullin signaling pathway	2.97	0.0203	-2	IL18,IL1RN,MAP2K6,PPARG			Dendritic Cell Maturation	2.42	0.0217	-2	CSF2,IKBKE,IL1RN,TNFRSF1B										Pancreatic Adenocarcinoma Signaling	6.86	0.0642	-2.646	AKT1,CCND1,CDKN1A,MAPK3,PIK3CG,PIK3R1,RALGDS
		Neuroinflammation Signaling Pathway	8.05	0.05	-3.357	CD40,CREB5,CXCL10,ICAM1,IL1R1,IL6,IRAK3,IRF7,NFKB2,PLCG1,PTGS2,STAT1,TLR3,TNF,VCAM1			HMGB1 Signaling	5.36	0.0485	-2.236	FOS,IL1B,MAP2K7,RAP2A,RHOV,SERPINE1,TNFSF10,Tnfsf9			Activation of IRF by Cytosolic Pattern Recognition Receptors	5.66	0.0794	-2.236	CD40,IL6,IRF9,JUN,STAT1										Production of Nitric Oxide and Reactive Oxygen Species in Macrophages	2.34	0.0206	-2	APOB,IKBKE,NOS2,TNFRSF1B										Glioma Signaling	6.83	0.0636	-2.236	AKT1,CCND1,CDKN1A,MAPK3,PIK3CG,PIK3R1,PLCG1
		Role of IL-17F in Allergic Inflammatory Airway Diseases	7.37	0.156	-2.449	CREB5,CSF2,CXCL10,CXCL6,IL6,MMP13,NFKB2			Toll-like Receptor Signaling	5.32	0.0779	-2	EIF2AK2,FOS,IL1B,IL1RN,NFKBIA,UBC			HMGB1 Signaling	4.73	0.0364	-2.236	IFNGR1,IL12B,IL6,JUN,TLR4,VCAM1										Neuroinflammation Signaling Pathway	2.33	0.0159	-2.236	BIRC3,CASP1,FAS,IKBKE,NOS2										ErbB4 Signaling	6.77	0.0882	-2.236	AKT1,MAPK3,PIK3CG,PIK3R1,PLCG1,PSEN1
		PPAR Signaling	4.86	0.0673	2.646	IL1R1,IL1RN,NFKB2,NFKBIE,PDGFB,PTGS2,TNF			MIF Regulation of Innate Immunity	5.28	0.111	-2.236	CD74,FOS,NFKBIA,NOS2,PTGS2			Colorectal Cancer Metastasis Signaling	4.61	0.0271	-2.449	ATP,IFNGR1,IL6,JUN,STAT1,TLR4,TLR7										Endothelin-1 Signaling	2.28	0.0199	-2	CASP1,CASP4,EDN1,NOS2										Non-Small Cell Lung Cancer Signaling	6.58	0.0822	-2.449	AKT1,CCND1,MAPK3,PIK3CG,PIK3R1,PLCG1
		Cardiac Hypertrophy Signaling (Enhanced)	4.71	0.0288	-3.606	CSF2,EDN1,EDNRB,IL15RA,IL1R1,IL2RG,IL6,IL7R,ITGA5,NFKB2,PLCG1,PTGS2,TNF,TNFSF10			iNOS Signaling	5.14	0.104	-2	FOS,IRF1,NFKBIA,NOS2,STAT1			NF-κB Signaling	4.53	0.0335	-2.449	CD40,IRAK4,TAB1,TLR4,TLR7,TNFRSF11A																								TREM1 Signaling	6.51	0.08	-2.449	AKT1,ITGB1,MAPK3,MYD88,PLCG1,TLR1
		Leukocyte Extravasation Signaling	4.71	0.0455	-2.121	CDH5,CLDN5,CXCR4,ICAM1,ITGA5,ITGB3,MMP13,PLCG1,VCAM1			Colorectal Cancer Metastasis Signaling	4.8	0.0349	-2.828	ATP,FOS,MMP13,NOS2,PTGS2,RAP2A,RHOV,STAT1,VEGFA			Production of Nitric Oxide and Reactive Oxygen Species in Macrophages	4.33	0.0309	-2.449	IFNGR1,IRF1,JUN,PON1,STAT1,TLR4																								Colorectal Cancer Metastasis Signaling	6.47	0.0356	-2.333	AKT1,CASP3,CCND1,MAPK3,MMP15,PIK3CG,PIK3R1,RALGDS,TLR1
		iNOS Signaling	4.67	0.111	-2.236	CD14,IRAK3,NFKB2,NFKBIE,STAT1			Tec Kinase Signaling	4.35	0.0419	-2.449	FAS,FOS,ITGB1,RHOV,STAT1,STAT2,TNFSF10			TREM1 Signaling	3.92	0.0526	-2	CD40,IL6,TLR4,TLR7																								Neuregulin Signaling	5.87	0.0625	-2.236	AKT1,ITGB1,MAPK3,PIK3R1,PLCG1,PSEN1
		Tec Kinase Signaling	4.46	0.0488	-2.449	ITGA5,NFKB2,PAK1,PLCG1,STAT1,STAT2,TNF,TNFSF10			T Cell Exhaustion Signaling Pathway	4.16	0.0391	-2	CD274,FOS,HLA-DMA,RAP2A,STAT1,STAT2,VEGFA			JAK/Stat Signaling	3.83	0.05	-2	CEBPB,IL6,JUN,STAT1																								Lymphotoxin β Receptor Signaling	5.86	0.0943	-2.236	AKT1,CASP3,MAPK3,PIK3CG,PIK3R1
		TNFR1 Signaling	4.44	0.1	-2	NFKB2,NFKBIE,PAK1,TNF,TNFAIP3			Cholecystokinin/Gastrin-mediated Signaling	4.14	0.0484	-2.449	FOS,IL1B,IL1RN,PTGS2,RAP2A,RHOV			Role of Pattern Recognition Receptors in Recognition of Bacteria and Viruses	3.78	0.0325	-2	CREB1,IL12B,IL6,TLR4,TLR7																								Apelin Cardiomyocyte Signaling Pathway	5.79	0.0606	-2.236	AKT1,HIF1A,MAPK3,PIK3CG,PIK3R1,PLCG1
		IL-6 Signaling	4.34	0.056	-2.449	CD14,IL1R1,IL1RN,IL6,NFKB2,NFKBIE,TNF			Dendritic Cell Maturation	4.08	0.038	-2.646	FCGR1A,HLA-DMA,IL1B,IL1RN,NFKBIA,STAT1,STAT2			Th17 Activation Pathway	3.58	0.043	-2	IL12B,IL23A,IL6,IRAK4																								EGF Signaling	5.78	0.0909	-2.236	AKT1,MAPK3,PIK3CG,PIK3R1,PLCG1
		MIF-mediated Glucocorticoid Regulation	3.92	0.118	-2	CD14,NFKB2,NFKBIE,PTGS2			Oncostatin M Signaling	4.01	0.093	-2	MMP13,PLAU,RAP2A,STAT1			IL-1 Signaling	3.56	0.0426	-2	ATP,IRAK4,JUN,TAB1																								VEGF Signaling	5.77	0.06	-2.449	AKT1,HIF1A,MAPK3,PIK3CG,PIK3R1,PLCG1
		Antioxidant Action of Vitamin C	3.8	0.0561	2.236	CSF2,NFKB2,NFKBIE,PLCG1,SLC2A1,TNF			Production of Nitric Oxide and Reactive Oxygen Species in Macrophages	3.94	0.0361	-2.646	FOS,IRF1,MAP2K7,NFKBIA,NOS2,RHOV,STAT1			Acute Phase Response Signaling	3.46	0.0276	-2.236	CEBPB,CFB,IL6,JUN,TAB1																								Telomerase Signaling	5.6	0.0561	-2	AKT1,CDKN1A,HDAC5,MAPK3,PIK3CG,PIK3R1
		iCOS-iCOSL Signaling in T Helper Cells	3.71	0.0541	-2.236	CD40,GRAP2,IL2RG,NFKB2,NFKBIE,PLCG1			Adrenomedullin signaling pathway	3.79	0.0341	-2.646	ADM,CEBPB,FOS,IL1B,IL1RN,MAP2K7,RAP2A			p38 MAPK Signaling	3.18	0.0339	-2	CREB1,IRAK4,STAT1,TAB1																								Endometrial Cancer Signaling	5.59	0.0833	-2.236	AKT1,CCND1,MAPK3,PIK3CG,PIK3R1
		p38 MAPK Signaling	3.57	0.0508	-2.449	CREB5,IL1R1,IL1RN,IRAK3,STAT1,TNF			Unfolded protein response	3.56	0.0714	-2	CEBPB,CEBPD,Hspa1b,MAP2K7			IL-6 Signaling	3.09	0.032	-2	CEBPB,IL6,JUN,TAB1																								Paxillin Signaling	5.55	0.055	-2	ITGA6,ITGB1,ITGB3,PARVA,PIK3CG,PIK3R1
		MIF Regulation of Innate Immunity	3.56	0.0952	-2	CD14,NFKB2,NFKBIE,PTGS2			Retinoic acid Mediated Apoptosis Signaling	3.36	0.0635	-2	IRF1,PARP14,TIPARP,TNFSF10			PI3K Signaling in B Lymphocytes	2.87	0.028	-2	CD40,CREB1,JUN,TLR4																								ErbB2-ErbB3 Signaling	5.42	0.0769	-2.236	AKT1,CCND1,MAPK3,PIK3CG,PIK3R1
		NF-κB Activation by Viruses	3.41	0.061	-2.236	EIF2AK2,ITGA5,ITGB3,NFKB2,NFKBIE			HGF Signaling	3.33	0.0439	-2	FOS,ITGB1,MAP2K7,PTGS2,RAP2A			Cardiac Hypertrophy Signaling	2.84	0.0201	-2.236	ATP,CREB1,IL6,JUN,TAB1																								NF-κB Signaling	5.4	0.0391	-2.646	AKT1,BTRC,MYD88,PIK3CG,PIK3R1,TLR1,TNFRSF11A
		FAT10 Cancer Signaling Pathway	3.41	0.087	-2	CXCR4,IL6,NFKB2,TNF			ILK Signaling	3.12	0.0312	-2.236	FOS,ITGB1,NOS2,PTGS2,RHOV,VEGFA			Cardiac Hypertrophy Signaling (Enhanced)	2.2	0.012	-2.236	ATP,IL12B,IL15RA,IL3RA,IL6,JUN																								Growth Hormone Signaling	5.23	0.0704	-2.236	IRS1,MAPK3,PIK3CG,PIK3R1,PLCG1
		Th17 Activation Pathway	3.2	0.0549	-2.236	CSF2,IL1R1,IL6,IRAK3,NFKB2			LXR/RXR Activation	3.11	0.0391	2	IL1B,IL1RN,MSR1,NOS2,PTGS2																															P2Y Purigenic Receptor Signaling Pathway	5.16	0.0472	-2.236	AKT1,ITGB3,MAPK3,PIK3CG,PIK3R1,PLCG1
		PAK Signaling	3.08	0.0515	-2	CFL2,ITGA5,PAK1,PDGFB,TNF			TREM1 Signaling	3.05	0.0526	-2	CXCL3,IL1B,ITGB1,NLRP3																															Estrogen-Dependent Breast Cancer Signaling	5.14	0.0676	-2.236	AKT1,CCND1,MAPK3,PIK3CG,PIK3R1
		HGF Signaling	2.82	0.045	-2	IL6,ITGA5,PAK1,PLCG1,PTGS2			Endothelin-1 Signaling	2.99	0.0296	-2.449	ATP,CASP4,FOS,NOS2,PTGS2,RAP2A																															Leptin Signaling in Obesity	5.14	0.0676	-2	AKT1,MAPK3,PIK3CG,PIK3R1,PLCG1
		Type I Diabetes Mellitus Signaling	2.82	0.045	-2.236	IL1R1,NFKB2,NFKBIE,STAT1,TNF			NF-κB Activation by Viruses	2.91	0.0482	-2	EIF2AK2,ITGB1,NFKBIA,RAP2A																															Adrenomedullin signaling pathway	5.13	0.0355	-2.449	AKT1,CASP3,HIF1A,MAPK3,PIK3CG,PIK3R1,PLCG1
		Renin-Angiotensin Signaling	2.7	0.0424	-2	NFKB2,PAK1,PLCG1,STAT1,TNF			PI3K Signaling in B Lymphocytes	2.89	0.035	-2.236	ATF3,CD180,FOS,NFKBIA,RAP2A																															p70S6K Signaling	5.13	0.0465	-2.449	AKT1,IRS1,MAPK3,PIK3CG,PIK3R1,PLCG1
		CD28 Signaling in T Helper Cells	2.67	0.0417	-2	GRAP2,NFKB2,NFKBIE,PAK1,PLCG1			PDGF Signaling	2.74	0.0435	-2	EIF2AK2,FOS,RAP2A,STAT1																															Leukocyte Extravasation Signaling	5.11	0.0354	-2.646	ITGA6,ITGB1,ITGB3,MMP15,PIK3CG,PIK3R1,PLCG1
		Ephrin Receptor Signaling	2.61	0.0333	-2.236	CFL2,CREB5,CXCR4,ITGA5,PAK1,PDGFB			IL-1 Signaling	2.71	0.0426	-2	ATP,FOS,MAP2K7,NFKBIA																															IL-8 Signaling	5.1	0.0352	-2.646	AKT1,CCND1,IQGAP1,ITGB3,MAPK3,PIK3CG,PIK3R1
		IL-7 Signaling Pathway	2.55	0.0513	-2	IL2RG,IL7R,SLC2A1,STAT1			Signaling by Rho Family GTPases	2.57	0.0244	-2.449	CDH11,CDH5,FOS,ITGB1,MAP2K7,RHOV																															GDNF Family Ligand-Receptor Interactions	5.08	0.0658	-2.236	IRS1,MAPK3,PIK3CG,PIK3R1,PLCG1
		Production of Nitric Oxide and Reactive Oxygen Species in Macrophages	2.52	0.0319	-2.449	NFKB2,NFKBIE,PLCG1,PON1,STAT1,TNF			Role of NFAT in Regulation of the Immune Response	2.39	0.0267	-2	FCGR1A,FOS,HLA-DMA,NFKBIA,RAP2A																															Neurotrophin/TRK Signaling	5.08	0.0658	-2.236	AKT1,MAPK3,PIK3CG,PIK3R1,PLCG1
		Colorectal Cancer Metastasis Signaling	2.51	0.0277	-2.646	IL6,MMP13,NFKB2,PTGS2,STAT1,TLR3,TNF			p38 MAPK Signaling	2.35	0.0339	-2	FAS,IL1B,IL1RN,STAT1																															IL-7 Signaling Pathway	5.02	0.0641	-2.236	AKT1,CCND1,MAPK3,PIK3CG,PIK3R1
		JAK/Stat Signaling	2.51	0.05	-2	IL6,NFKB2,STAT1,STAT2			PPARα/RXRα Activation	2.31	0.0256	2	ATP,IL1B,MAP2K7,NFKBIA,RAP2A																															Renal Cell Carcinoma Signaling	4.97	0.0625	-2	AKT1,HIF1A,MAPK3,PIK3CG,PIK3R1
		ILK Signaling	2.49	0.0314	-2.449	CFL2,CREB5,ITGB3,NFKB2,PTGS2,TNF			IL-8 Signaling	2.23	0.0245	-2.236	FOS,PTGS2,RAP2A,RHOV,VEGFA																															PI3K Signaling in B Lymphocytes	4.96	0.0435	-2.236	AKT1,IRS1,MAPK3,PIK3CG,PIK3R1,PLCG1
		LPS-stimulated MAPK Signaling	2.47	0.0488	-2	CD14,NFKB2,NFKBIE,PAK1			Cardiac Hypertrophy Signaling (Enhanced)	2.14	0.016	-2.236	ATP,IL1B,ITGB1,MAP2K7,PTGS2,RAP2A,TNFSF10,Tnfsf9																															Prolactin Signaling	4.94	0.0617	-2.236	IRS1,MAPK3,PIK3CG,PIK3R1,PLCG1
		PI3K Signaling in B Lymphocytes	2.41	0.0362	-2.236	BLNK,CD40,NFKB2,NFKBIE,PLCG1			PKCθ Signaling in T Lymphocytes	1.91	0.0252	-2	FOS,HLA-DMA,NFKBIA,RAP2A																															Ovarian Cancer Signaling	4.94	0.0432	-2	AKT1,CCND1,MAPK3,PIK3CG,PIK3R1,PTGS1
		PDGF Signaling	2.39	0.0465	-2	EIF2AK2,PDGFB,PLCG1,STAT1			PI3K/AKT Signaling	1.74	0.0223	-2	ITGB1,NFKBIA,PTGS2,RAP2A																															VEGF Family Ligand-Receptor Interactions	4.87	0.0595	-2.236	AKT1,MAPK3,PIK3CG,PIK3R1,PLCG1
		IL-1 Signaling	2.31	0.044	-2	IL1R1,IRAK3,NFKB2,NFKBIE			RhoGDI Signaling	1.68	0.0215	2	CDH11,CDH5,ITGB1,RHOV																															FGF Signaling	4.87	0.0595	-2.236	AKT1,MAPK3,PIK3CG,PIK3R1,PLCG1
		Integrin Signaling	2.25	0.028	-2.236	ITGA5,ITGB3,NEDD9,PAK1,PDGFB,PLCG1			ERK/MAPK Signaling	1.6	0.0203	-2	FOS,ITGB1,RAP2A,STAT1																															RANK Signaling in Osteoclasts	4.77	0.0568	-2.236	AKT1,MAPK3,PIK3CG,PIK3R1,TNFRSF11A
		Rac Signaling	2	0.036	-2	CFL2,ITGA5,NFKB2,PAK1			Synaptogenesis Signaling Pathway	1.46	0.0156	-2	ATP,CDH11,CDH5,GRINA,RAP2A																															Acute Myeloid Leukemia Signaling	4.74	0.0562	-2.236	AKT1,CCND1,MAPK3,PIK3CG,PIK3R1
		Signaling by Rho Family GTPases	1.99	0.0247	-2.236	CDC42EP2,CDH5,CFL2,ITGA5,NFKB2,PAK1			Cardiac Hypertrophy Signaling	1.29	0.0161	-2	ATP,MAP2K7,RAP2A,RHOV																															IL-23 Signaling Pathway	4.71	0.0909	-2	AKT1,HIF1A,PIK3CG,PIK3R1
		Cholecystokinin/Gastrin-mediated Signaling	1.9	0.0336	-2	CCK,IL1RN,PTGS2,TNF																																						Role of Pattern Recognition Receptors in Recognition of Bacteria and Viruses	4.69	0.039	-2.449	C5AR1,MAPK3,MYD88,PIK3CG,PIK3R1,TLR1
		B Cell Receptor Signaling	1.88	0.027	-2.236	BLNK,CFL2,CREB5,NFKB2,NFKBIE																																						Regulation of eIF4 and p70S6K Signaling	4.64	0.0382	-2.449	AKT1,IRS1,ITGB1,MAPK3,PIK3CG,PIK3R1
		RhoA Signaling	1.85	0.0325	-2	CDC42EP2,CFL2,LPAR1,RHPN1																																						Fcγ Receptor-mediated Phagocytosis in Macrophages and Monocytes	4.63	0.0532	-2.236	AKT1,MAPK3,PIK3CG,PIK3R1,PLCG1
		ERK/MAPK Signaling	1.81	0.0259	-2.236	CREB5,ITGA5,PAK1,PLCG1,STAT1																																						ErbB Signaling	4.63	0.0532	-2.236	AKT1,MAPK3,PIK3CG,PIK3R1,PLCG1
		IL-8 Signaling	1.76	0.0251	-2.236	ICAM1,IRAK3,ITGB3,PTGS2,VCAM1																																						PAK Signaling	4.56	0.0515	-2.236	CASP3,ITGB1,MAPK3,PIK3CG,PIK3R1
		PI3K/AKT Signaling	1.75	0.0303	-2	ITGA5,NFKB2,NFKBIE,PTGS2																																						UVA-Induced MAPK Signaling	4.54	0.051	-2	CASP3,MAPK3,PIK3CG,PIK3R1,PLCG1
		Type II Diabetes Mellitus Signaling	1.65	0.0282	-2	CD36,NFKB2,NFKBIE,TNF																																						UVB-Induced MAPK Signaling	4.42	0.0769	-2	AKT1,MAPK3,PIK3CG,PIK3R1
		PKCθ Signaling in T Lymphocytes	1.53	0.0258	-2	GRAP2,NFKB2,NFKBIE,PLCG1																																						IGF-1 Signaling	4.42	0.0481	-2.236	AKT1,IRS1,MAPK3,PIK3CG,PIK3R1
		Cdc42 Signaling	1.43	0.024	-2	CDC42EP2,CFL2,ITGA5,PAK1																																						Rac Signaling	4.28	0.045	-2.236	IQGAP1,ITGB1,MAPK3,PIK3CG,PIK3R1
		Endothelin-1 Signaling	1.28	0.0215	-2	EDN1,EDNRB,PLCG1,PTGS2																																						Dendritic Cell Maturation	4.27	0.0328	-2.449	AKT1,MAPK3,MYD88,PIK3CG,PIK3R1,PLCG1
		Adrenomedullin signaling pathway	1.21	0.0203	-2	IL1RN,NFKB2,PLCG1,TNF																																						Endothelin-1 Signaling	4.23	0.0323	-2.449	CASP3,MAPK3,PIK3CG,PIK3R1,PLCG1,PTGS1
		Synaptogenesis Signaling Pathway	0.682	0.0128	-2	CDH5,CREB5,PAK1,PLCG1																																						NGF Signaling	4.23	0.0439	-2.236	AKT1,MAPK3,PIK3CG,PIK3R1,PLCG1
																																												Endocannabinoid Developing Neuron Pathway	4.21	0.0435	-2.236	AKT1,CCND1,MAPK3,PIK3CG,PIK3R1
																																												Production of Nitric Oxide and Reactive Oxygen Species in Macrophages	4.2	0.0319	-2.449	AKT1,APOD,MAPK3,PIK3CG,PIK3R1,PLCG1
																																												CNTF Signaling	4.18	0.0667	-2	AKT1,MAPK3,PIK3CG,PIK3R1
																																												Fc Epsilon RI Signaling	4.17	0.0427	-2.236	AKT1,MAPK3,PIK3CG,PIK3R1,PLCG1
																																												IL-2 Signaling	4.15	0.0656	-2	AKT1,MAPK3,PIK3CG,PIK3R1
																																												Thrombopoietin Signaling	4.09	0.0635	-2	MAPK3,PIK3CG,PIK3R1,PLCG1
																																												Role of PI3K/AKT Signaling in the Pathogenesis of Influenza	4.06	0.0625	-2	AKT1,MAPK3,PIK3CG,PIK3R1
																																												IL-17A Signaling in Airway Cells	4.06	0.0625	-2	AKT1,MAPK3,PIK3CG,PIK3R1
																																												IL-6 Signaling	4.04	0.04	-2	AKT1,CD14,MAPK3,PIK3CG,PIK3R1
																																												SPINK1 General Cancer Pathway	3.94	0.058	-2	AKT1,MAPK3,PIK3CG,PIK3R1
																																												Role of NFAT in Cardiac Hypertrophy	3.89	0.028	-2.236	AKT1,HDAC5,MAPK3,PIK3CG,PIK3R1,PLCG1
																																												Small Cell Lung Cancer Signaling	3.89	0.0563	-2	AKT1,CCND1,PIK3CG,PIK3R1
																																												Glioma Invasiveness Signaling	3.82	0.0541	-2	ITGB3,MAPK3,PIK3CG,PIK3R1
																																												Agrin Interactions at Neuromuscular Junction	3.73	0.0513	-2	ITGA6,ITGB1,ITGB3,MAPK3
																																												IL-3 Signaling	3.71	0.0506	-2	AKT1,MAPK3,PIK3CG,PIK3R1
																																												Relaxin Signaling	3.68	0.0336	-2	AKT1,GDE1,MAPK3,PIK3CG,PIK3R1
																																												LPS-stimulated MAPK Signaling	3.65	0.0488	-2	CD14,MAPK3,PIK3CG,PIK3R1
																																												FLT3 Signaling in Hematopoietic Progenitor Cells	3.63	0.0482	-2	AKT1,MAPK3,PIK3CG,PIK3R1
																																												Cardiac Hypertrophy Signaling	3.62	0.025	-2.449	AKT1,IRS1,MAPK3,PIK3CG,PIK3R1,PLCG1
																																												Gαq Signaling	3.57	0.0318	-2.236	AKT1,MAPK3,PIK3CG,PIK3R1,PLCG1
																																												PDGF Signaling	3.57	0.0465	-2	MAPK3,PIK3CG,PIK3R1,PLCG1
																																												Aldosterone Signaling in Epithelial Cells	3.56	0.0316	-2.236	MAPK3,PIK3CG,PIK3R1,PLCG1,SGK1
																																												Melanocyte Development and Pigmentation Signaling	3.42	0.0426	-2	MAPK3,PIK3CG,PIK3R1,PLCG1
																																												T Cell Exhaustion Signaling Pathway	3.36	0.0286	2	AKT1,MAPK3,PIK3CG,PIK3R1,PLCG1
																																												Nitric Oxide Signaling in the Cardiovascular System	3.33	0.0404	-2	AKT1,MAPK3,PIK3CG,PIK3R1
																																												Systemic Lupus Erythematosus In B Cell Signaling Pathway	3.31	0.0218	-2.449	AKT1,CCND1,MAPK3,MYD88,PIK3CG,PIK3R1
																																												Neuropathic Pain Signaling In Dorsal Horn Neurons	3.3	0.0396	-2	MAPK3,PIK3CG,PIK3R1,PLCG1
																																												Role of NFAT in Regulation of the Immune Response	3.29	0.0276	-2.236	AKT1,MAPK3,PIK3CG,PIK3R1,PLCG1
																																												Mouse Embryonic Stem Cell Pluripotency	3.27	0.0388	-2	AKT1,MAPK3,PIK3CG,PIK3R1
																																												PD-1, PD-L1 cancer immunotherapy pathway	3.22	0.0377	2	AKT1,PIK3CG,PIK3R1,PLCG1
																																												ERK/MAPK Signaling	3.16	0.0259	-2.236	ITGB1,MAPK3,PIK3CG,PIK3R1,PLCG1
																																												iCOS-iCOSL Signaling in T Helper Cells	3.15	0.036	-2	AKT1,PIK3CG,PIK3R1,PLCG1
																																												Renin-Angiotensin Signaling	3.05	0.0339	-2	MAPK3,PIK3CG,PIK3R1,PLCG1
																																												Role of NANOG in Mammalian Embryonic Stem Cell Pluripotency	3.03	0.0336	-2	AKT1,MAPK3,PIK3CG,PIK3R1
																																												GP6 Signaling Pathway	3.03	0.0336	-2	AKT1,ITGB3,PIK3CG,PIK3R1
																																												CREB Signaling in Neurons	3.03	0.0242	-2.236	AKT1,MAPK3,PIK3CG,PIK3R1,PLCG1
																																												CD28 Signaling in T Helper Cells	3.02	0.0333	-2	AKT1,PIK3CG,PIK3R1,PLCG1
																																												Thrombin Signaling	3.02	0.024	-2.236	AKT1,MAPK3,PIK3CG,PIK3R1,PLCG1
																																												G Beta Gamma Signaling	2.99	0.0328	-2	AKT1,MAPK3,PIK3CG,PLCG1
																																												Gα12/13 Signaling	2.89	0.0308	-2	AKT1,MAPK3,PIK3CG,PIK3R1
																																												Signaling by Rho Family GTPases	2.72	0.0206	-2.236	IQGAP1,ITGB1,MAPK3,PIK3CG,PIK3R1
																																												PKCθ Signaling in T Lymphocytes	2.61	0.0258	-2	MAPK3,PIK3CG,PIK3R1,PLCG1
																																												Tec Kinase Signaling	2.52	0.0244	-2	ITGB1,PIK3CG,PIK3R1,PLCG1
																																												HMGB1 Signaling	2.51	0.0242	-2	AKT1,MAPK3,PIK3CG,PIK3R1
																																												CXCR4 Signaling	2.49	0.024	-2	AKT1,MAPK3,PIK3CG,PIK3R1
																																												Ephrin Receptor Signaling	2.38	0.0222	-2	AKT1,ITGB1,MAPK3,PIK3CG
																																												Sirtuin Signaling Pathway	2.38	0.0171	2	AKT1,HIF1A,MAPK3,SREBF1,VDAC1
																																												B Cell Receptor Signaling	2.34	0.0216	-2	AKT1,MAPK3,PIK3CG,PIK3R1
																																												Synaptogenesis Signaling Pathway	2.26	0.016	-2.236	AKT1,MAPK3,PIK3CG,PIK3R1,PLCG1
[truncated: 6 more columns]
