# Supplementary material for: Approaching Inflammation Paradoxes—Proinflammatory Cytokine Blockages Induce Inflammatory Regulators
Source: Front Immunol. 2020 Oct 19;11:554301. doi: 10.3389/fimmu.2020.554301 (PMC7604447; doi:10.3389/fimmu.2020.554301)
Supplement: Supplementary Table S10 — IPA results of up- and down-regulated innatomic genes in anti-TNF therapy microarray. [file Table_10.xlsx]

## Sheet: Sheet1
© 2000-2019 QIAGEN. All rights reserved.
Ingenuity Canonical Pathways	-log(p-value)	Ratio	z-score	Molecules
Systemic Lupus Erythematosus In B Cell Signaling Pathway	34.7	0.189	4.258	BCL10,BCL2L11,CBL,CD40,CD40LG,CD5,CD72,CSF2,CTNNB1,FYN,HCK,IFIH1,IFIT2,IFIT3,IFNAR2,IFNB1,IFNG,IL10,IL12B,IL15,IL1A,IL1B,IL6,INPP5D,IRF5,IRF7,IRF9,ISG15,ISG20,LILRB4,LTB,LYN,MALT1,MAP3K14,MAP4K4,MAPK3,NFKB2,OSM,PDCD1,PIK3AP1,PIK3CG,PTPN6,SHC3,STAT1,STAT2,TGFB1,TLR8,TLR9,TNF,TNFSF13B,Tnfsf9,TRAF1,VAV1
Altered T Cell and B Cell Signaling in Rheumatoid Arthritis	30.6	0.356	#NUM!	CD28,CD40,CD40LG,CSF1,CSF2,CXCL13,FCER1G,HLA-A,HLA-DMA,IFNG,IL10,IL12B,IL15,IL1A,IL1B,IL1RN,IL23A,IL6,LTB,MAP3K14,NFKB2,RELB,TGFB1,TLR1,TLR2,TLR4,TLR5,TLR6,TLR8,TLR9,TNF,TNFSF13B
NF-κB Signaling	28	0.218	3.893	BCL10,CASP8,CD40,CD40LG,FCER1G,IKBKB,IL1A,IL1B,IL1R1,IL1RN,IRAK3,MALT1,MAP3K1,MAP3K14,MAP3K3,MAP3K8,MAP4K4,NFKB2,NFKBIA,NFKBID,NFKBIE,NGF,PIK3CG,RELB,SIGIRR,TDP2,TLR1,TLR2,TLR4,TLR5,TLR6,TLR8,TLR9,TNF,TNFAIP3,TNFRSF11A,TNFRSF1B,TNFSF13B,TRADD
Granulocyte Adhesion and Diapedesis	27.8	0.215	#NUM!	C5AR1,CCL19,CCL2,Ccl2,CCL22,CCL3L3,CCL4,Ccl7,CSF3,CXCL10,CXCL11,CXCL13,CXCL2,CXCL3,Cxcl3,CXCL6,Cxcl9,CXCR4,EZR,ICAM1,ICAM2,IL1A,IL1B,IL1R1,IL1RN,ITGA4,ITGA5,ITGA6,ITGAM,ITGB2,MMP14,MMP15,MMP7,MMP9,SELE,SELL,TNF,TNFRSF1B,VCAM1
Role of Macrophages, Fibroblasts and Endothelial Cells in Rheumatoid Arthritis	26.8	0.151	#NUM!	C5AR1,CCL2,CEBPA,CEBPB,CREB5,CSF1,CSF2,CTNNB1,FGF2,ICAM1,IKBKB,IL10,IL15,IL1A,IL1B,IL1R1,IL1RN,IL6,IRAK2,IRAK3,LTB,MAP3K14,MAPK3,NFKBIA,NFKBID,NFKBIE,OSM,PDGFA,PDGFB,PIK3CG,SELE,SOCS1,SOCS3,TGFB1,TLR1,TLR2,TLR4,TLR5,TLR6,TLR8,TLR9,TNF,TNFRSF1B,TNFSF13B,TRADD,TRAF1,VCAM1,VEGFC
Communication between Innate and Adaptive Immune Cells	26.6	0.309	#NUM!	CCL3L3,CCL4,CD28,CD40,CD40LG,CD83,CD8A,CD8B,CSF2,CXCL10,FCER1G,HLA-A,IFNB1,IFNG,IL10,IL12B,IL15,IL1A,IL1B,IL1RN,IL6,TLR1,TLR2,TLR4,TLR5,TLR6,TLR8,TLR9,TNF,TNFSF13B
Neuroinflammation Signaling Pathway	26	0.149	5.105	ACVR2A,ATP,BIRC3,CASP1,CASP8,CCL2,CD40,CFLAR,CREB5,CTNNB1,CXCL10,GRINA,HLA-A,HLA-DMA,ICAM1,IFNB1,IFNG,IKBKB,IL10,IL12B,IL1B,IL1R1,IL6,IRAK2,IRAK3,IRF7,JAK3,MAPK3,MMP9,NFKB2,NGF,NLRP3,PIK3CG,PLA2G5,PTGS2,SOD2,STAT1,TGFB1,TLR1,TLR2,TLR4,TLR5,TLR6,TLR8,TLR9,TNF,VCAM1
Role of Pattern Recognition Receptors in Recognition of Bacteria and Viruses	25.9	0.227	3.578	C3AR1,C5AR1,CASP1,CD40LG,CSF2,IFIH1,IFNB1,IFNG,IL10,IL12B,IL15,IL1A,IL1B,IL6,IRF7,LTB,MAPK3,NFKB2,NLRP3,OAS1,OAS2,OSM,PIK3CG,RIPK2,TGFB1,TLR1,TLR2,TLR4,TLR5,TLR6,TLR8,TLR9,TNF,TNFSF13B,Tnfsf9
Agranulocyte Adhesion and Diapedesis	24.5	0.192	#NUM!	ACTG2,C5AR1,CCL19,CCL2,Ccl2,CCL22,CCL3L3,CCL4,Ccl7,CXCL10,CXCL11,CXCL13,CXCL2,CXCL3,Cxcl3,CXCL6,Cxcl9,CXCR4,EZR,ICAM1,ICAM2,IL1A,IL1B,IL1R1,IL1RN,ITGA4,ITGA5,ITGA6,ITGB2,MMP14,MMP15,MMP7,MMP9,SELE,SELL,TNF,VCAM1
TREM1 Signaling	24.4	0.342	4.315	CASP1,CCL2,CD40,CD83,CSF2,CXCL3,ICAM1,IL10,IL1B,IL6,ITGA5,ITGAX,MAPK3,MPO,NFKB2,NLRP3,SIGIRR,STAT5A,TLR1,TLR2,TLR4,TLR5,TLR6,TLR8,TLR9,TNF
Toll-like Receptor Signaling	24.2	0.338	2.982	CD14,ECSIT,IKBKB,IL12B,IL1A,IL1B,IL1RN,IRAK2,IRAK3,LY96,MAP3K1,MAP3K14,MAP4K4,NFKB2,NFKBIA,SIGIRR,TLR1,TLR2,TLR4,TLR5,TLR6,TLR8,TLR9,TNF,TNFAIP3,TRAF1
Dendritic Cell Maturation	24.2	0.196	5.145	CD40,CD40LG,CD83,CREB5,CSF2,DDR2,FCER1G,HLA-A,HLA-DMA,ICAM1,IFNB1,IKBKB,IL10,IL12B,IL15,IL1A,IL1B,IL1RN,IL23A,IL6,LTB,MAP3K14,MAPK3,NFKB2,NFKBIA,NFKBID,NFKBIE,PIK3CG,RELB,STAT1,STAT2,TLR2,TLR4,TLR9,TNF,TNFRSF1B
Th1 and Th2 Activation Pathway	22.9	0.197	#NUM!	ACVR2A,CCR1,CD247,CD274,CD28,CD3E,CD40,CD40LG,CD8A,CXCR4,HLA-A,HLA-DMA,ICAM1,IFNG,IL10,IL10RA,IL12B,IL2RA,IL2RB,IL2RG,IL6,IRF1,ITGB2,JAG1,JAK3,MAF,PIK3CG,S1PR1,SOCS1,SOCS3,STAT1,STAT5A,TGFB1,VAV1
Crosstalk between Dendritic Cells and Natural Killer Cells	19.7	0.267	#NUM!	ACTG2,CD28,CD40,CD40LG,CD69,CD83,CSF2,CSF2RB,HLA-A,IFNB1,IFNG,IL12B,IL15,IL15RA,IL2RB,IL2RG,IL3RA,IL6,LTB,NFKB2,TLR4,TLR9,TNF,TNFRSF1B
Hepatic Cholestasis	18.8	0.161	#NUM!	ABCG5,ABCG8,ATP,CD14,CD40LG,CSF2,IFNG,IKBKB,IL12B,IL15,IL1A,IL1B,IL1R1,IL1RN,IL6,IRAK2,IRAK3,LTB,LY96,MAP3K14,NFKB2,NFKBIA,NFKBID,NFKBIE,OSM,SREBF1,TGFB1,TLR4,TNF,TNFRSF1B,TNFSF13B,Tnfsf9
Hepatic Fibrosis / Hepatic Stellate Cell Activation	17.5	0.158	#NUM!	CCL2,CD14,CD40,CD40LG,CSF1,CXCL3,FGF2,ICAM1,IFNAR2,IFNG,IL10,IL10RA,IL1A,IL1B,IL1R1,IL6,LY96,MMP9,NFKB2,PDGFA,PDGFB,SERPINE1,STAT1,TGFB1,TIMP1,TLR4,TNF,TNFRSF1B,VCAM1,VEGFC
Type I Diabetes Mellitus Signaling	17.2	0.214	3.578	CASP8,CD247,CD28,CD3E,FCER1G,HLA-A,HLA-DMA,IFNG,IKBKB,IL12B,IL1B,IL1R1,IRF1,MAP3K14,NFKB2,NFKBIA,NFKBID,NFKBIE,SOCS1,SOCS3,STAT1,TNF,TNFRSF1B,TRADD
Th2 Pathway	17.2	0.19	2.683	ACVR2A,CCR1,CD247,CD28,CD3E,CD40,CXCR4,HLA-A,HLA-DMA,ICAM1,IFNG,IL10,IL12B,IL2RA,IL2RB,IL2RG,ITGB2,JAG1,JAK3,MAF,PIK3CG,S1PR1,SOCS3,STAT5A,TGFB1,VAV1
HMGB1 Signaling	17.2	0.17	2.837	CCL2,CD40LG,CSF2,ICAM1,IFNG,IL12B,IL15,IL1A,IL1B,IL1R1,IL6,LTB,MAPK3,NFKB2,OSM,PIK3CG,RHOC,RHOH,RHOV,SELE,SERPINE1,TGFB1,TLR4,TNF,TNFRSF1B,TNFSF13B,Tnfsf9,VCAM1
Atherosclerosis Signaling	17.2	0.2	#NUM!	APOE,CCL2,CCR2,CD40,CD40LG,CSF1,CXCR4,ICAM1,IFNG,IL1A,IL1B,IL1RN,IL6,ITGA4,ITGB2,MMP9,MSR1,NFKB2,PDGFA,PDGFB,PLA2G5,SELE,TGFB1,TNF,VCAM1
Acute Phase Response Signaling	17.1	0.16	2.746	APCS,C1R,CEBPB,CFB,ECSIT,IKBKB,IL1A,IL1B,IL1R1,IL1RN,IL6,MAP3K1,MAP3K14,MAPK3,NFKB2,NFKBIA,NFKBID,NFKBIE,OSM,PIK3CG,SERPINE1,SERPINF1,SERPING1,SOCS1,SOCS3,SOD2,TNF,TNFRSF1B,TRADD
Cardiac Hypertrophy Signaling (Enhanced)	16.1	0.0904	4.644	ACVR2A,ATP,CD40LG,CSF2,CSF2RB,CTNNB1,EIF4E,FGF11,FGF2,IFNG,IKBKB,IL10RA,IL12B,IL15,IL15RA,IL1A,IL1B,IL1R1,IL2RA,IL2RB,IL2RG,IL3RA,IL6,IL7R,ITGA4,ITGA5,ITPR1,LTB,MAP3K1,MAP3K14,MAP3K3,MAP3K8,MAPK3,NFKB2,OSM,PDE4B,PIK3CG,PTGS2,PTK2,TDP2,TGFB1,TNF,TNFRSF1B,TNFSF13B,Tnfsf9
CD28 Signaling in T Helper Cells	16.1	0.192	2.5	BCL10,CD247,CD28,CD3E,CTLA4,FCER1G,FYN,GRAP2,HLA-A,HLA-DMA,IKBKB,ITK,ITPR1,MALT1,MAP3K1,NFKB2,NFKBIA,NFKBID,NFKBIE,PAK1,PIK3CG,PTPN6,VAV1,WAS
Interferon Signaling	15.8	0.417	2.673	IFIT3,IFITM2,IFITM3,IFNAR2,IFNB1,IFNG,IRF1,IRF9,ISG15,MX1,OAS1,SOCS1,STAT1,STAT2,TAP1
Activation of IRF by Cytosolic Pattern Recognition Receptors	15.5	0.286	1.886	CD40,DHX58,IFIH1,IFIT2,IFNB1,IKBKB,IL10,IL6,IRF7,IRF9,ISG15,NFKB2,NFKBIA,NFKBID,NFKBIE,STAT1,STAT2,TNF
Th1 Pathway	15.2	0.187	2.524	CD247,CD274,CD28,CD3E,CD40,CD40LG,CD8A,HLA-A,HLA-DMA,ICAM1,IFNG,IL10,IL10RA,IL12B,IL6,IRF1,ITGB2,JAK3,PIK3CG,SOCS1,SOCS3,STAT1,VAV1
Glucocorticoid Receptor Signaling	15	0.105	#NUM!	CCL2,CD163,CD247,CD3E,CEBPA,CEBPB,CSF2,CXCL3,ICAM1,IFNG,IKBKB,IL10,IL1B,IL1RN,IL6,JAK3,MAP3K1,MAP3K14,MAPK3,NCOA3,NFKBIA,NFKBID,NFKBIE,PCK2,PIK3CG,PLAU,POU2F2,PTGS2,SELE,SERPINE1,STAT1,STAT5A,TGFB1,TNF,TSC22D3,VCAM1
iCOS-iCOSL Signaling in T Helper Cells	14.7	0.19	3.357	CD247,CD28,CD3E,CD40,CD40LG,FCER1G,GRAP2,HLA-A,HLA-DMA,IKBKB,IL2RA,IL2RB,IL2RG,INPP5D,ITK,ITPR1,NFKB2,NFKBIA,NFKBID,NFKBIE,PIK3CG,VAV1
T Cell Exhaustion Signaling Pathway	14.3	0.145	2.294	ACVR2A,BATF,BCL6,CD274,CD28,CTLA4,FCER1G,HLA-A,HLA-DMA,IFNAR2,IFNG,IL10,IL10RA,IL12B,IL6,IRF4,IRF9,JAK3,MAPK3,PDCD1,PIK3CG,PRDM1,PTPN6,STAT1,STAT2,TGFB1
IL-10 Signaling	14.2	0.247	#NUM!	CCR1,CD14,IKBKB,IL10,IL10RA,IL1A,IL1B,IL1R1,IL1RN,IL6,MAP3K14,MAP4K4,NFKB2,NFKBIA,NFKBID,NFKBIE,SOCS3,TNF
T Helper Cell Differentiation	14.1	0.243	#NUM!	BCL6,CD28,CD40,CD40LG,FCER1G,HLA-A,HLA-DMA,IFNG,IL10,IL10RA,IL12B,IL2RA,IL2RG,IL6,STAT1,TGFB1,TNF,TNFRSF1B
Colorectal Cancer Metastasis Signaling	13.7	0.116	2.646	ARRB1,ATP,CDH1,CTNNB1,IFNG,IL6,JAK3,MAPK3,MMP14,MMP15,MMP7,MMP9,NFKB2,PIK3CG,PTGS2,RALGDS,RHOC,RHOH,RHOV,STAT1,TGFB1,TLR1,TLR2,TLR4,TLR5,TLR6,TLR8,TLR9,TNF,VEGFC
Production of Nitric Oxide and Reactive Oxygen Species in Macrophages	13.4	0.134	3.674	APOE,IFNG,IKBKB,IRF1,JAK3,MAP3K1,MAP3K14,MAP3K3,MAP3K8,MAPK3,MPO,NFKB2,NFKBIA,NFKBID,NFKBIE,PIK3CG,PPP1R3C,PTPN6,RHOC,RHOH,RHOV,STAT1,TLR2,TLR4,TNF,TNFRSF1B
IL-6 Signaling	12.9	0.168	3.13	CD14,CEBPB,IKBKB,IL1A,IL1B,IL1R1,IL1RN,IL6,MAP3K14,MAP4K4,MAPK3,NFKB2,NFKBIA,NFKBID,NFKBIE,PIK3CG,SOCS1,SOCS3,TNF,TNFAIP6,TNFRSF1B
Phagosome Formation	12.9	0.168	#NUM!	C3AR1,C5AR1,FCER1G,ITGA4,ITGA5,ITGAM,ITGAX,ITGB2,MSR1,PIK3CG,RHOC,RHOH,RHOV,SCARA3,TLR1,TLR2,TLR4,TLR5,TLR6,TLR8,TLR9
LXR/RXR Activation	12.7	0.164	-3.153	ABCG5,ABCG8,APOE,CCL2,CD14,IL1A,IL1B,IL1R1,IL1RN,IL6,LDLR,LY96,MMP9,MSR1,NFKB2,PTGS2,SERPINF1,SREBF1,TLR4,TNF,TNFRSF1B
CD40 Signaling	12.7	0.246	1.069	CD40,CD40LG,ICAM1,IKBKB,JAK3,MAP3K14,MAPK3,NFKB2,NFKBIA,NFKBID,NFKBIE,PIK3CG,PTGS1,PTGS2,TNFAIP3,TRAF1
TNFR2 Signaling	12.5	0.4	2.53	BIRC3,IKBKB,MAP3K1,MAP3K14,NFKB2,NFKBIA,NFKBID,NFKBIE,TNF,TNFAIP3,TNFRSF1B,TRAF1
PPAR Signaling	12.4	0.183	-3.441	IKBKB,IL1A,IL1B,IL1R1,IL1RN,MAP3K14,MAP4K4,MAPK3,NFKB2,NFKBIA,NFKBID,NFKBIE,PDGFA,PDGFB,PPARG,PTGS2,STAT5A,TNF,TNFRSF1B
iNOS Signaling	12.3	0.292	3.606	CD14,IFNG,IKBKB,IRAK2,IRAK3,IRF1,JAK3,LY96,NFKB2,NFKBIA,NFKBID,NFKBIE,STAT1,TLR4
Tec Kinase Signaling	12.2	0.138	3.411	ACTG2,FCER1G,FYN,HCK,ITGA4,ITGA5,ITK,JAK3,LYN,NFKB2,PAK1,PIK3CG,PTK2,RHOC,RHOH,RHOV,STAT1,STAT2,STAT5A,TLR4,TNF,VAV1,WAS
IL-12 Signaling and Production in Macrophages	12.2	0.154	#NUM!	APOE,CD40,CD40LG,CEBPB,IFNG,IKBKB,IL10,IL12B,IL23A,IRF1,MAF,MAP3K8,MAPK3,NFKB2,PIK3CG,PPARG,STAT1,TGFB1,TLR2,TLR4,TNF
Osteoarthritis Pathway	12.1	0.118	3.128	ATP,CASP1,CASP4,CASP8,CEBPB,CREB5,CTNNB1,DDR2,FGF2,HIF1A,IL1B,IL1R1,ITGA4,ITGA5,JAG1,MMP9,NAMPT,NFKB2,PPARG,PTGS2,TGFB1,TLR2,TLR4,TNF,TNFRSF1B,VEGFC
T Cell Receptor Signaling	12	0.173	#NUM!	BCL10,CBL,CD247,CD28,CD3E,CD8A,CD8B,CTLA4,FYN,GRAP2,IKBKB,ITK,MALT1,MAP3K1,MAPK3,NFKB2,NFKBIA,PIK3CG,VAV1
Role of Osteoblasts, Osteoclasts and Chondrocytes in Rheumatoid Arthritis	11.9	0.115	#NUM!	BIRC3,CBL,CSF1,CSF2,CTNNB1,IFNG,IKBKB,IL10,IL1A,IL1B,IL1R1,IL1RN,IL6,ITGA5,MAP3K14,MAPK3,MMP14,NFKBIA,NFKBID,NFKBIE,PIK3CG,TGFB1,TNF,TNFRSF11A,TNFRSF1B,TRADD
PI3K Signaling in B Lymphocytes	11.8	0.147	2.683	ATF3,BCL10,CBL,CD180,CD40,FYN,IKBKB,INPP5D,IRS2,ITPR1,LYN,MALT1,MAPK3,NFKB2,NFKBIA,NFKBID,NFKBIE,PIK3AP1,PIK3CG,TLR4,VAV1
PKCθ Signaling in T Lymphocytes	11.8	0.138	3.838	BCL10,CD247,CD28,CD3E,FCER1G,FYN,GRAP2,HLA-A,HLA-DMA,IKBKB,MALT1,MAP3K1,MAP3K14,MAP3K3,MAP3K8,MAPK3,NFKB2,NFKBIA,NFKBID,NFKBIE,PIK3CG,VAV1
Role of Hypercytokinemia/hyperchemokinemia in the Pathogenesis of Influenza	11.7	0.302	#NUM!	CCL2,CCL4,CCR1,CXCL10,IFNB1,IFNG,IL12B,IL15,IL1A,IL1B,IL1RN,IL6,TNF
Role of Cytokines in Mediating Communication between Immune Cells	11.5	0.259	#NUM!	CSF2,CSF3,IFNB1,IFNG,IL10,IL12B,IL15,IL1A,IL1B,IL1RN,IL23A,IL6,TGFB1,TNF
Leukocyte Extravasation Signaling	11.2	0.118	1.877	ACTG2,BCAR1,CD44,CTNNB1,CXCR4,EZR,ICAM1,ITGA4,ITGA5,ITGA6,ITGAM,ITGB2,ITK,MMP14,MMP15,MMP7,MMP9,PIK3CG,PTK2,RHOH,TIMP1,VAV1,VCAM1,WAS
Th17 Activation Pathway	11.2	0.183	3.638	BATF,CSF2,FCER1G,HIF1A,IFNG,IL10,IL12B,IL1B,IL1R1,IL23A,IL6,IRAK2,IRAK3,IRF4,JAK3,NFKB2,SOCS3
Differential Regulation of Cytokine Production in Intestinal Epithelial Cells by IL-17A and IL-17F	11	0.435	#NUM!	CCL2,CCL4,CSF2,CSF3,IFNG,IL10,IL12B,IL1A,IL1B,TNF
MSP-RON Signaling Pathway	11	0.237	#NUM!	ACTG2,CCL2,CCR2,CSF1,CSF2RB,IFNG,IL12B,IL3RA,ITGAM,ITGB2,PIK3CG,TLR2,TLR4,TNF
TNFR1 Signaling	10.8	0.26	2.887	BIRC3,CASP8,IKBKB,MAP3K1,MAP3K14,NFKB2,NFKBIA,NFKBID,NFKBIE,PAK1,TNF,TNFAIP3,TRADD
Differential Regulation of Cytokine Production in Macrophages and T Helper Cells by IL-17A and IL-17F	10.6	0.5	#NUM!	CCL2,CCL4,CSF2,CSF3,IL10,IL12B,IL1B,IL6,TNF
STAT3 Pathway	10.3	0.14	0.577	CSF2RB,FGF2,IL10RA,IL15RA,IL1A,IL1B,IL1R1,IL2RA,IL2RB,IL2RG,IL3RA,IL7R,MAPK3,PDGFB,PTPN6,SOCS1,SOCS3,TGFB1,TNFRSF11A
B Cell Receptor Signaling	10.2	0.116	2.985	BCL10,BCL6,CREB5,IKBKB,INPP5D,LYN,MALT1,MAP3K1,MAP3K14,MAP3K3,MAP3K8,MAPK3,NFKB2,NFKBIA,NFKBID,NFKBIE,PIK3AP1,PIK3CG,POU2F2,PTK2,PTPN6,VAV1
PD-1, PD-L1 cancer immunotherapy pathway	10.2	0.159	-1.291	CD247,CD274,CD28,HLA-A,HLA-DMA,IFNG,IL12B,IL2RA,IL2RB,IL2RG,JAK3,PDCD1,PIK3CG,STAT5A,TGFB1,TNF,TNFRSF1B
MIF-mediated Glucocorticoid Regulation	10	0.306	2.714	CD14,CD74,LY96,MAPK3,NFKB2,NFKBIA,NFKBID,NFKBIE,PLA2G5,PTGS2,TLR4
Role of JAK1 and JAK3 in γc Cytokine Signaling	9.97	0.203	#NUM!	IL15,IL15RA,IL2RA,IL2RB,IL2RG,IL7R,IRS2,JAK3,MAPK3,PIK3CG,SOCS1,SOCS3,STAT1,STAT5A
Type II Diabetes Mellitus Signaling	9.77	0.123	3	ACSL1,ADIPOR2,ATP,CEBPB,IKBKB,IRS2,MAP3K1,MAP3K14,MAPK3,NFKB2,NFKBIA,NFKBID,NFKBIE,PIK3CG,PPARG,SOCS1,SOCS3,TNF,TNFRSF1B,TRADD
IL-15 Signaling	9.71	0.194	#NUM!	CSF2,IL15,IL15RA,IL2RB,IL2RG,IL6,JAK3,MAPK3,NFKB2,PIK3CG,PTK2,STAT5A,TNF,VCAM1
Hematopoiesis from Pluripotent Stem Cells	9.65	0.245	#NUM!	CD247,CD3E,CD8A,CD8B,CSF1,CSF2,CSF3,FCER1G,IL10,IL12B,IL1A,IL6
Induction of Apoptosis by HIV1	9.59	0.213	1.387	BIRC3,CASP8,CXCR4,IKBKB,MAP3K14,NFKB2,NFKBIA,NFKBID,NFKBIE,TNF,TNFRSF1B,TRADD,TRAF1
LPS/IL-1 Mediated Inhibition of RXR Function	9.38	0.1	2.496	ABCG5,ABCG8,ACSL1,ALDH1L1,APOE,CD14,CHST1,ECSIT,FABP4,GSTZ1,HMGCS1,IL1A,IL1B,IL1R1,IL1RN,IL4I1,LY96,MAP3K1,NDST2,SREBF1,TLR4,TNF,TNFRSF1B
Role of PKR in Interferon Induction and Antiviral Response	9.36	0.268	#NUM!	CASP8,IFNB1,IFNG,IKBKB,IRF1,NFKB2,NFKBIA,NFKBID,NFKBIE,STAT1,TNF
Regulation of IL-2 Expression in Activated and Anergic T Lymphocytes	9.3	0.165	#NUM!	BCL10,CD247,CD28,CD3E,FYN,IKBKB,MALT1,MAP3K1,MAPK3,NFKB2,NFKBIA,NFKBID,NFKBIE,TGFB1,VAV1
Death Receptor Signaling	9.3	0.165	0.775	ACTG2,BIRC3,CASP8,CFLAR,IKBKB,MAP3K14,MAP4K4,NFKB2,NFKBIA,NFKBID,NFKBIE,PARP14,TNF,TNFRSF1B,TRADD
Systemic Lupus Erythematosus In T Cell Signaling Pathway	9.24	0.0821	1.961	BCL6,CASP1,CASP4,CASP8,CBL,CD247,CD28,CD3E,CD40LG,CD44,CREB5,EZR,FCER1G,HLA-A,HLA-DMA,IL10,IL12B,IL23A,IL6,IRF4,ITPR1,MAPK3,PIK3CG,PTK2,RHOC,RHOH,RHOV,VAV1
Systemic Lupus Erythematosus Signaling	9.19	0.0983	#NUM!	CBL,CD247,CD28,CD3E,CD40,CD40LG,CD72,FCER1G,HLA-A,IL10,IL1A,IL1B,IL1RN,IL6,INPP5D,LSM3,LYN,MAPK3,PIK3CG,PTPN6,TLR9,TNF,TNFSF13B
IL-7 Signaling Pathway	9.07	0.175	1.387	BCL6,FYN,IFNG,IL2RG,IL7R,JAK3,LYN,MAPK3,PIK3CG,PTK2,SLC2A1,SOCS1,STAT1,STAT5A
MIF Regulation of Innate Immunity	8.89	0.244	2.714	CD14,CD74,LY96,MAPK3,NFKB2,NFKBIA,NFKBID,NFKBIE,PLA2G5,PTGS2,TLR4
TWEAK Signaling	8.86	0.286	0	BIRC3,CASP8,IKBKB,MAP3K14,NFKB2,NFKBIA,NFKBID,NFKBIE,TRADD,TRAF1
IL-17A Signaling in Fibroblasts	8.86	0.286	#NUM!	CCL2,CEBPB,IKBKB,IL6,MAPK3,NFKB2,NFKBIA,NFKBID,NFKBIE,NFKBIZ
FAT10 Cancer Signaling Pathway	8.77	0.239	2.111	ACVR2A,CTNNB1,CXCR4,IFNG,IKBKB,IL6,NFKB2,NFKBIA,TGFB1,TNF,TNFRSF1B
PI3K/AKT Signaling	8.48	0.124	1.5	CTNNB1,EIF4E,IKBKB,INPP5D,ITGA4,ITGA5,JAK3,LIMS1,MAP3K8,MAPK3,NFKB2,NFKBIA,NFKBID,NFKBIE,PIK3CG,PTGS2,YWHAZ
ILK Signaling	8.47	0.104	0.471	ACTG2,CDH1,CREB5,CTNNB1,HIF1A,IRS2,ITGB2,LIMS1,MAPK3,MMP9,NFKB2,PARVB,PIK3CG,PTGS2,PTK2,RHOC,RHOH,RHOV,TNF,VEGFC
RANK Signaling in Osteoclasts	8.44	0.157	2.111	BIRC3,CBL,IKBKB,MAP3K1,MAP3K14,MAP3K3,MAP3K8,MAPK3,NFKB2,NFKBIA,NFKBID,NFKBIE,PIK3CG,TNFRSF11A
Germ Cell-Sertoli Cell Junction Signaling	8.41	0.109	#NUM!	ACTG2,BCAR1,CDH1,CTNNB1,ITGA6,MAP3K1,MAP3K14,MAP3K3,MAP3K8,MAPK3,PAK1,PIK3CG,PTK2,RHOC,RHOH,RHOV,TGFB1,TJP1,TNF
Integrin Signaling	8.4	0.0977	1.091	ACTG2,BCAR1,CAPN2,FYN,ITGA4,ITGA5,ITGA6,ITGAM,ITGAX,ITGB2,LIMS1,MAPK3,PAK1,PARVB,PDGFB,PIK3CG,PTK2,RHOC,RHOH,RHOV,WAS
Inflammasome pathway	8.13	0.364	2.828	AIM2,ATP,CASP1,CASP8,IL1B,NFKB2,NLRP3,TLR4
IL-8 Signaling	8.09	0.0985	2.982	CDH1,ICAM1,IKBKB,IRAK2,IRAK3,ITGAM,ITGAX,ITGB2,MAP4K4,MAPK3,MMP9,MPO,PIK3CG,PTGS2,PTK2,RHOC,RHOH,RHOV,VCAM1,VEGFC
PEDF Signaling	7.92	0.159	0.632	CASP8,CFLAR,IKBKB,MAPK3,NFKB2,NFKBIA,NFKBID,NFKBIE,NGF,PIK3CG,PPARG,SERPINF1,SOD2
Lymphotoxin β Receptor Signaling	7.89	0.2	1.414	IKBKB,LTB,MAP3K14,MAPK3,NFKB2,NFKBIA,NFKBID,PIK3CG,RELB,TRAF1,VCAM1
NF-κB Activation by Viruses	7.86	0.157	2.496	IKBKB,ITGA4,ITGA5,ITGA6,ITGB2,MAP3K1,MAP3K14,MAPK3,NFKB2,NFKBIA,NFKBID,NFKBIE,PIK3CG
IL-9 Signaling	7.83	0.273	1.667	IL2RG,IRS2,JAK3,NFKB2,PIK3CG,SOCS3,STAT1,STAT5A,TNF
Apoptosis Signaling	7.83	0.141	1.155	BCL2L11,BIRC3,CAPN2,CASP8,IKBKB,MAP3K14,MAP4K4,MAPK3,NFKB2,NFKBIA,NFKBID,NFKBIE,TNF,TNFRSF1B
Role of RIG1-like Receptors in Antiviral Innate Immunity	7.8	0.227	1.89	CASP8,DHX58,IFIH1,IFNB1,IKBKB,IRF7,NFKB2,NFKBIA,NFKBID,NFKBIE
IL-23 Signaling Pathway	7.8	0.227	1.897	CSF2,HIF1A,IL12B,IL1B,IL23A,NFKB2,NFKBIA,PIK3CG,SOCS3,TNF
Role of JAK1, JAK2 and TYK2 in Interferon Signaling	7.79	0.333	0	IFNAR2,IFNB1,IFNG,NFKB2,PTPN6,SOCS1,STAT1,STAT2
Role of IL-17F in Allergic Inflammatory Airway Diseases	7.7	0.222	2.333	CCL2,CCL4,CREB5,CSF2,CXCL10,CXCL6,IL1B,IL6,MAPK3,NFKB2
Role of Tissue Factor in Cancer	7.5	0.123	#NUM!	ARRB1,CSF1,CSF2,EIF4E,FYN,HCK,IL1B,ITGA6,LYN,MAPK3,PAK1,PIK3CG,PLAUR,STAT5A,VEGFC
CTLA4 Signaling in Cytotoxic T Lymphocytes	7.48	0.146	#NUM!	AP2A2,CD247,CD28,CD3E,CD8A,CD8B,CTLA4,FCER1G,FYN,GRAP2,HLA-A,PIK3CG,PTPN6
Ephrin Receptor Signaling	7.33	0.0984	2.309	BCAR1,CREB5,CXCR4,EFNB2,FYN,GRINA,ITGA4,ITGA5,MAP3K14,MAP4K4,MAPK3,PAK1,PDGFA,PDGFB,PIK3CG,PTK2,VEGFC,WAS
Graft-versus-Host Disease Signaling	7.32	0.204	#NUM!	CD28,FCER1G,HLA-A,HLA-DMA,IFNG,IL1A,IL1B,IL1RN,IL6,TNF
Complement System	7.24	0.237	-0.447	C1R,C3AR1,C5AR1,CFB,CFD,ITGAM,ITGAX,ITGB2,SERPING1
Primary Immunodeficiency Signaling	7.23	0.2	#NUM!	CD3E,CD40,CD40LG,CD8A,IL2RG,IL7R,JAK3,RFX5,TAP1,UNG
IL-1 Signaling	7.19	0.138	3.051	ATP,ECSIT,IKBKB,IL1A,IL1R1,IRAK2,IRAK3,MAP3K1,MAP3K14,NFKB2,NFKBIA,NFKBID,NFKBIE
JAK/Stat Signaling	7.09	0.15	1.155	CEBPB,IL6,JAK3,MAPK3,NFKB2,PIK3CG,PTPN6,SOCS1,SOCS3,STAT1,STAT2,STAT5A
IL-17A Signaling in Airway Cells	7.03	0.167	0.905	CXCL3,CXCL6,IKBKB,IL6,JAK3,MAPK3,NFKB2,NFKBIA,NFKBID,NFKBIE,PIK3CG
CD27 Signaling in Lymphocytes	6.97	0.189	1.89	CASP8,IKBKB,MAP3K1,MAP3K14,MAP3K3,MAP3K8,NFKB2,NFKBIA,NFKBID,NFKBIE
B Cell Activating Factor Signaling	6.94	0.22	2.449	IKBKB,MAP3K1,MAP3K14,NFKB2,NFKBIA,NFKBID,NFKBIE,TNFSF13B,TRAF1
Fcγ Receptor-mediated Phagocytosis in Macrophages and Monocytes	6.87	0.13	1.387	ACTG2,CBL,CSF2,EZR,FYN,HCK,INPP5D,LYN,MAPK3,PAK1,PIK3CG,VAV1,WAS
Role of IL-17A in Arthritis	6.74	0.179	#NUM!	CCL2,CXCL3,CXCL6,MAPK3,NFKB2,NFKBIA,NFKBID,NFKBIE,PIK3CG,PTGS2
IL-15 Production	6.71	0.116	#NUM!	CLK1,DDR2,FYN,HCK,IFNB1,IL15,IL6,IRF1,ITK,JAK3,LYN,NFKB2,PTK2,STAT1
4-1BB Signaling in T Lymphocytes	6.7	0.25	1.342	IKBKB,MAP3K14,MAPK3,NFKB2,NFKBIA,NFKBID,NFKBIE,TRAF1
Molecular Mechanisms of Cancer	6.57	0.065	#NUM!	ATP,BCL2L11,BIRC3,CASP8,CBL,CDH1,CFLAR,CTNNB1,FYN,HIF1A,ITGA4,ITGA5,JAK3,MAPK3,NFKB2,NFKBIA,NFKBID,NFKBIE,PAK1,PIK3CG,PTK2,RALGDS,RHOC,RHOH,RHOV,TGFB1
Role of NFAT in Regulation of the Immune Response	6.46	0.0909	3.051	CD247,CD28,CD3E,FCER1G,FYN,HLA-A,HLA-DMA,IKBKB,ITK,ITPR1,LYN,MAPK3,NFKB2,NFKBIA,NFKBID,NFKBIE,PIK3CG
Glioma Invasiveness Signaling	6.44	0.147	0.905	CD44,MAPK3,MMP9,PIK3CG,PLAU,PLAUR,PTK2,RHOC,RHOH,RHOV,TIMP1
Role of JAK family kinases in IL-6-type Cytokine Signaling	6.29	0.28	#NUM!	IL6,MAPK3,OSM,SOCS1,SOCS3,STAT1,STAT5A
Reelin Signaling in Neurons	6.27	0.141	#NUM!	APOE,CDK5R1,CNR2,FYN,HCK,ITGA4,ITGA5,ITGA6,ITGB2,LYN,PIK3CG
Erythropoietin Signaling	6.21	0.139	#NUM!	CBL,MAPK3,NFKB2,NFKBIA,NFKBID,NFKBIE,PIK3CG,PTPN6,SOCS1,SOCS3,STAT5A
PPARα/RXRα Activation	6.21	0.0872	-2.673	ACVR2A,ADIPOR2,AP2A2,ATP,IKBKB,IL1B,IL1R1,IL6,MAP3K14,MAP4K4,MAPK3,NCOA3,NFKB2,NFKBIA,NFKBID,NFKBIE,TGFB1
ERK/MAPK Signaling	6.15	0.0863	1.291	BCAR1,CREB5,DUSP2,DUSP4,EIF4E,FYN,ITGA4,ITGA5,MAPK3,PAK1,PIK3CG,PLA2G5,PPARG,PPP1R3C,PTK2,STAT1,YWHAZ
LPS-stimulated MAPK Signaling	6.04	0.134	2.714	CD14,IKBKB,MAP3K14,MAPK3,NFKB2,NFKBIA,NFKBID,NFKBIE,PAK1,PIK3CG,TLR4
p38 MAPK Signaling	6.02	0.11	3.464	CREB5,IL1A,IL1B,IL1R1,IL1RN,IRAK2,IRAK3,PLA2G5,STAT1,TGFB1,TNF,TNFRSF1B,TRADD
April Mediated Signaling	5.98	0.205	0.707	IKBKB,MAP3K1,MAP3K14,NFKB2,NFKBIA,NFKBID,NFKBIE,TRAF1
HOTAIR Regulatory Pathway	5.91	0.0932	1.291	CD44,CDH1,CTNNB1,ICAM1,IRF1,MMP14,MMP15,MMP7,MMP9,NFKB2,NFKBIA,PIK3CG,RHOC,TGFB1,TLR4
Cholecystokinin/Gastrin-mediated Signaling	5.78	0.105	0.832	BCAR1,IL1A,IL1B,IL1RN,ITPR1,MAPK3,PTGS2,PTK2,RHOC,RHOH,RHOV,SST,TNF
Renin-Angiotensin Signaling	5.66	0.102	2.887	ATP,CCL2,ITPR1,MAP3K1,MAPK3,NFKB2,PAK1,PIK3CG,PTK2,PTPN6,SHC3,STAT1,TNF
Phospholipase C Signaling	5.57	0.0717	1.291	CD247,CD3E,CREB5,FCER1G,FYN,GRAP2,ITGA4,ITGA5,ITK,ITPR1,LYN,MAPK3,NFKB2,PLA2G5,RALGDS,RHOC,RHOH,RHOV,TGM2
Caveolar-mediated Endocytosis Signaling	5.52	0.133	#NUM!	ACTG2,CD48,FYN,HLA-A,ITGA4,ITGA5,ITGA6,ITGAM,ITGAX,ITGB2
Gα12/13 Signaling	5.51	0.0992	1.265	CDH1,CDH11,CTNNB1,IKBKB,MAP3K1,MAPK3,NFKB2,NFKBIA,NFKBID,NFKBIE,PIK3CG,PTK2,VAV1
Antioxidant Action of Vitamin C	5.44	0.106	-2.714	CSF2,CSF2RB,IKBKB,MAPK3,NFKB2,NFKBIA,NFKBID,NFKBIE,PLA2G5,SLC2A1,STAT5A,TNF
Actin Cytoskeleton Signaling	5.4	0.0762	0.577	ACTG2,BCAR1,CD14,EZR,FGF11,FGF2,ITGA4,ITGA5,MAPK3,PAK1,PDGFA,PDGFB,PIK3CG,PIP5K1B,PTK2,VAV1,WAS
HGF Signaling	5.4	0.105	2.714	IL6,ITGA4,ITGA5,MAP3K1,MAP3K14,MAP3K3,MAP3K8,MAPK3,PAK1,PIK3CG,PTGS2,PTK2
Sirtuin Signaling Pathway	5.38	0.0646	-0.243	ATP,BCL2L11,CDH1,CYC1,GABPB1,GADD45B,H1F0,HIF1A,MAPK3,NAD ,NAMPT,NFKB2,PCK2,PFKFB3,PPARG,SLC2A1,SOD2,SREBF1,TNF,UCP2,VDAC1
VDR/RXR Activation	5.31	0.127	1.414	CAMP,CD14,CEBPA,CEBPB,CSF2,CXCL10,IFNG,NCOA3,PDGFA,THBD
FAK Signaling	5.27	0.112	#NUM!	ACTG2,BCAR1,CAPN2,FYN,ITGA4,ITGA5,MAPK3,PAK1,PIK3CG,PTK2,WAS
IL-17 Signaling	5.26	0.125	#NUM!	CCL2,CEBPB,CXCL10,CXCL11,IL6,MAP3K14,MAPK3,PIK3CG,PTGS2,TIMP1
Sphingosine-1-phosphate Signaling	5.13	0.0992	-0.577	CASP1,CASP4,CASP8,MAPK3,PDGFA,PDGFB,PIK3CG,PTK2,RHOC,RHOH,RHOV,S1PR1
Sertoli Cell-Sertoli Cell Junction Signaling	4.91	0.0773	#NUM!	ACTG2,ATP,BCAR1,CDH1,CTNNB1,ITGA4,ITGA5,MAP3K1,MAP3K14,MAP3K3,MAP3K8,MAPK3,TJP1,TNF,WAS
Aryl Hydrocarbon Receptor Signaling	4.89	0.0872	0.905	ALDH1L1,CCNA2,GSTZ1,IL1A,IL1B,IL6,MAPK3,MCM7,NCOA3,NFKB2,TGFB1,TGM2,TNF
PTEN Signaling	4.88	0.0938	-0.302	BCAR1,BCL2L11,CBL,IKBKB,INPP5D,ITGA4,ITGA5,MAPK3,NFKB2,PIK3CG,PTK2,TNFRSF11A
Signaling by Rho Family GTPases	4.86	0.0694	0.243	ACTG2,CDC42EP4,CDH1,CDH11,EZR,ITGA4,ITGA5,MAPK3,NFKB2,PAK1,PIK3CG,PIP5K1B,PTK2,RHOC,RHOH,RHOV,WAS
Endocannabinoid Cancer Inhibition Pathway	4.86	0.0867	-0.277	ATF3,CASP1,CASP4,CASP8,CDH1,CNR2,CREB5,CTNNB1,HIF1A,MAPK3,PIK3CG,PTK2,VEGFC
Paxillin Signaling	4.82	0.101	1.134	ACTG2,BCAR1,ITGA4,ITGA5,ITGA6,ITGAM,ITGAX,ITGB2,PAK1,PIK3CG,PTK2
Small Cell Lung Cancer Signaling	4.69	0.122	2.449	IKBKB,NFKB2,NFKBIA,NFKBID,NFKBIE,PIK3CG,PTGS2,PTK2,TRAF1
Pathogenesis of Multiple Sclerosis	4.69	0.444	#NUM!	CCL4,CCR1,CXCL10,CXCL11
Rac Signaling	4.63	0.0965	2.111	CD44,CDK5R1,ITGA4,ITGA5,MAP3K1,MAPK3,NFKB2,PAK1,PIK3CG,PIP5K1B,PTK2
Macropinocytosis Signaling	4.6	0.118	2	CD14,CSF1,ITGA5,ITGB2,NGF,PAK1,PDGFA,PDGFB,PIK3CG
Angiopoietin Signaling	4.55	0.117	0	IKBKB,NFKB2,NFKBIA,NFKBID,NFKBIE,PAK1,PIK3CG,PTK2,STAT5A
IL-3 Signaling	4.46	0.114	1	CSF2RB,IL3RA,INPP5D,MAPK3,PAK1,PIK3CG,PTPN6,STAT1,STAT5A
Agrin Interactions at Neuromuscular Junction	4.46	0.114	1	ACTG2,GABPB1,ITGA4,ITGA5,ITGA6,ITGB2,MAPK3,PAK1,PTK2
IL-2 Signaling	4.37	0.127	1.414	IL2RA,IL2RB,IL2RG,JAK3,MAPK3,PIK3CG,SOCS1,STAT5A
Protein Kinase A Signaling	4.33	0.0535	0.5	ATP,CREB5,CTNNB1,DUSP2,DUSP4,EBI3,H1F0,ITPR1,MAP3K1,MAPK3,NFKB2,NFKBIA,NFKBID,NFKBIE,PDE4B,PPP1R3C,PTGS2,PTK2,PTPN6,TDP2,TGFB1,YWHAZ
Fc Epsilon RI Signaling	4.33	0.0894	1.414	CSF2,FCER1G,FYN,GRAP2,INPP5D,LYN,MAPK3,PIK3CG,PLA2G5,TNF,VAV1
FLT3 Signaling in Hematopoietic Progenitor Cells	4.29	0.108	1	CBL,CREB5,EIF4E,INPP5D,MAPK3,PIK3CG,STAT1,STAT2,STAT5A
Prolactin Signaling	4.25	0.107	0.707	CEBPB,FYN,IRF1,MAPK3,PIK3CG,SOCS1,SOCS3,STAT1,STAT5A
Clathrin-mediated Endocytosis Signaling	4.25	0.0714	#NUM!	ACTG2,AP2A2,APOE,ARRB1,CBL,FGF11,FGF2,ITGA5,ITGB2,LDLR,PDGFA,PDGFB,PIK3CG,VEGFC
Role of JAK2 in Hormone-like Cytokine Signaling	4.23	0.176	#NUM!	IRS2,PTPN6,SOCS1,SOCS3,STAT1,STAT5A
Role of PI3K/AKT Signaling in the Pathogenesis of Influenza	4.22	0.121	0	IFNB1,IFNG,MAPK3,NFKB2,NFKBIA,NFKBID,NFKBIE,PIK3CG
Allograft Rejection Signaling	4.13	0.103	#NUM!	CD28,CD40,CD40LG,FCER1G,HLA-A,HLA-DMA,IFNG,IL10,TNF
IL-4 Signaling	4.13	0.103	#NUM!	HLA-A,HLA-DMA,IL2RG,INPP5D,IRF4,JAK3,PIK3CG,PTPN6,SOCS1
Hematopoiesis from Multipotent Stem Cells	4.12	0.333	#NUM!	CSF1,CSF2,CSF3,IL15
Autoimmune Thyroid Disease Signaling	4.11	0.137	#NUM!	CD28,CD40,CD40LG,FCER1G,HLA-A,HLA-DMA,IL10
Sumoylation Pathway	4.08	0.0917	0.378	ATP,CDH1,CEBPA,ISG20,NFKB2,NFKBIA,PML,RHOC,RHOH,RHOV
Adrenomedullin signaling pathway	4.04	0.0683	2.673	ADM,CEBPB,HIF1A,IL1A,IL1B,IL1RN,ITPR1,MAPK3,NFKB2,PIK3CG,PPARG,PTK2,SHC3,TNF
OX40 Signaling Pathway	4.02	0.1	0.378	CD247,CD3E,FCER1G,HLA-A,HLA-DMA,NFKB2,NFKBIA,NFKBID,NFKBIE
Pancreatic Adenocarcinoma Signaling	4.01	0.0901	1.667	JAK3,MAPK3,MMP9,NFKB2,PIK3CG,PTGS2,RALGDS,STAT1,TGFB1,VEGFC
Adipogenesis pathway	3.96	0.0815	#NUM!	CEBPA,CEBPB,CTNNB1,EGR2,FABP4,FGF2,HIF1A,PPARG,SREBF1,TGFB1,TNF
Xenobiotic Metabolism Signaling	3.95	0.0586	#NUM!	ALDH1L1,CHST1,GSTZ1,IL1A,IL1B,IL4I1,IL6,MAF,MAP3K1,MAP3K14,MAP3K3,MAP3K8,MAPK3,NDST2,NFKB2,PIK3CG,TNF
Synaptogenesis Signaling Pathway	3.92	0.0562	1.698	AP2A2,APOE,ATP,CDH1,CDH11,CREB5,CTNNB1,EFNB2,FYN,GRINA,HCK,ITPR1,LYN,MAPK3,PAK1,PIK3CG,SHC3,WAS
FXR/RXR Activation	3.9	0.0803	#NUM!	ABCG5,ABCG8,APOE,IL1A,IL1B,IL1RN,PCK2,PPARG,SERPINF1,SREBF1,TNF
Antigen Presentation Pathway	3.88	0.154	#NUM!	CD74,HLA-A,HLA-DMA,IFNG,PSMB9,TAP1
Ephrin B Signaling	3.87	0.108	0.378	CBL,CTNNB1,CXCR4,EFNB2,MAPK3,PAK1,PTK2,VAV1
Growth Hormone Signaling	3.83	0.107	-0.707	CEBPA,MAPK3,PIK3CG,PTPN6,SOCS1,SOCS3,STAT1,STAT5A
Regulation of Actin-based Motility by Rho	3.8	0.0938	0.333	ACTG2,ITGA4,ITGA5,PAK1,PIP5K1B,RHOC,RHOH,RHOV,WAS
Bladder Cancer Signaling	3.76	0.0928	#NUM!	CDH1,FGF11,FGF2,MAPK3,MMP14,MMP15,MMP7,MMP9,VEGFC
NGF Signaling	3.73	0.0833	2.53	CREB5,IKBKB,MAP3K1,MAP3K14,MAP3K3,MAP3K8,MAPK3,NFKB2,NGF,PIK3CG
PAK Signaling	3.7	0.0909	1.667	ITGA4,ITGA5,MAPK3,PAK1,PDGFA,PDGFB,PIK3CG,PTK2,TNF
Semaphorin Signaling in Neurons	3.66	0.117	#NUM!	FYN,MAPK3,PAK1,PTK2,RHOC,RHOH,RHOV
Nur77 Signaling in T Lymphocytes	3.66	0.117	#NUM!	CD247,CD28,CD3E,FCER1G,HLA-A,HLA-DMA,MAP3K3
G-Protein Coupled Receptor Signaling	3.64	0.0573	#NUM!	ATP,CNR2,CREB5,DUSP4,FYN,IKBKB,MAP3K8,MAPK3,NFKB2,NFKBIA,NFKBID,NFKBIE,PDE4B,PIK3CG,S1PR1,TDP2
Oncostatin M Signaling	3.64	0.14	1.633	JAK3,MAPK3,OSM,PLAU,STAT1,STAT5A
Role of MAPK Signaling in the Pathogenesis of Influenza	3.59	0.0988	#NUM!	CCL2,CXCL10,IFNB1,IFNG,MAPK3,PLA2G5,PTGS2,TNF
CXCR4 Signaling	3.56	0.0686	1.155	ATP,BCAR1,CXCR4,ITPR1,LYN,MAPK3,PAK1,PIK3CG,PTK2,RHOC,RHOH,RHOV
Opioid Signaling Pathway	3.48	0.0577	1.291	AP2A2,ARRB1,ATP,CREB5,CTNNB1,FYN,GRINA,HCK,ITPR1,LYN,MAPK3,NFKB2,NFKBIA,PIK3CG,RGS1
Regulation of Cellular Mechanics by Calpain Protease	3.36	0.104	0	CAPN2,CCNA2,EZR,ITGA4,ITGA5,MAPK3,PTK2
Airway Pathology in Chronic Obstructive Pulmonary Disease	3.35	0.375	#NUM!	CXCL3,MMP9,TNF
FGF Signaling	3.35	0.0909	1.414	CREB5,FGF11,FGF2,ITPR1,MAP3K1,MAPK3,PIK3CG,PTPN6
Ephrin A Signaling	3.32	0.122	#NUM!	BCAR1,FYN,PAK1,PIK3CG,PTK2,VAV1
RhoGDI Signaling	3.32	0.0645	0	ACTG2,CD44,CDH1,CDH11,EZR,ITGA4,ITGA5,PAK1,PIP5K1B,RHOC,RHOH,RHOV
Virus Entry via Endocytic Pathways	3.27	0.0796	#NUM!	ACTG2,AP2A2,FYN,HLA-A,ITGA4,ITGA5,ITGA6,ITGB2,PIK3CG
Calcium-induced T Lymphocyte Apoptosis	3.24	0.1	1.633	CAPN2,CD247,CD3E,FCER1G,HLA-A,HLA-DMA,ITPR1
Axonal Guidance Signaling	3.23	0.0447	#NUM!	ADAM8,BCAR1,CXCR4,EFNB2,EIF4E,FYN,ITGA4,ITGA5,MAPK3,MMP14,MMP15,MMP7,MMP9,NGF,PAK1,PDGFA,PDGFB,PIK3CG,PTK2,ROBO1,VEGFC,WAS
Cytotoxic T Lymphocyte-mediated Apoptosis of Target Cells	3.22	0.147	2	CASP8,CD247,CD3E,FCER1G,HLA-A
PDGF Signaling	3.22	0.087	1.414	INPP5D,JAK3,MAP3K1,MAPK3,PDGFA,PDGFB,PIK3CG,STAT1
HIF1α Signaling	3.21	0.0783	#NUM!	HIF1A,MAPK3,MMP14,MMP15,MMP7,MMP9,PIK3CG,SLC2A1,VEGFC
Gαq Signaling	3.21	0.0667	0.707	IKBKB,ITPR1,MAPK3,NFKB2,NFKBIA,NFKBID,NFKBIE,PIK3CG,RHOC,RHOH,RHOV
GM-CSF Signaling	3.2	0.0986	1.89	CSF2,CSF2RB,HCK,LYN,MAPK3,PIK3CG,STAT1
Creatine-phosphate Biosynthesis	3.18	0.333	#NUM!	ATP,CKB,MAP4K4
Regulation of the Epithelial-Mesenchymal Transition Pathway	3.17	0.0622	#NUM!	CDH1,CTNNB1,FGF11,FGF2,HIF1A,JAG1,JAK3,MAPK3,MMP9,NFKB2,PIK3CG,TGFB1
Ovarian Cancer Signaling	3.17	0.0709	0.816	ARRB1,CD44,CTNNB1,MAPK3,MMP7,MMP9,PIK3CG,PTGS1,PTGS2,VEGFC
Coagulation System	3.16	0.143	0.447	PLAU,PLAUR,SERPINE1,TFPI,THBD
Prostate Cancer Signaling	3.12	0.0842	#NUM!	CREB5,CTNNB1,MAPK3,NFKB2,NFKBIA,NFKBID,NFKBIE,PIK3CG
Cdc42 Signaling	3.12	0.0651	3	CD247,CD3E,FCER1G,HLA-A,HLA-DMA,ITGA4,ITGA5,ITK,PAK1,VAV1,WAS
Insulin Receptor Signaling	3.08	0.069	-0.632	ATP,CBL,EIF4E,FYN,INPP5D,IRS2,MAPK3,PIK3CG,PPP1R3C,SOCS3
RAR Activation	3.02	0.0597	#NUM!	AKR1B1,Akr1b10,CSF2RB,IL3RA,MAP3K1,NFKB2,PIK3CG,PML,PNRC1,RELB,STAT5A,TGFB1
Natural Killer Cell Signaling	2.98	0.0726	#NUM!	CD247,FCER1G,FYN,INPP5D,MAPK3,PAK1,PIK3CG,PTPN6,VAV1
GNRH Signaling	2.91	0.0615	1.897	ATP,CREB5,ITPR1,MAP3K1,MAP3K14,MAP3K3,MAP3K8,MAPK3,NFKB2,PAK1,PTK2
Sperm Motility	2.9	0.0551	2.236	ATP,CLK1,DDR2,FYN,HCK,ITK,ITPR1,JAK3,LYN,PDE4B,PLA2G5,PTK2,SLC16A10
Inhibition of Matrix Metalloproteases	2.89	0.125	-0.447	MMP14,MMP15,MMP7,MMP9,TIMP1
IL-22 Signaling	2.87	0.167	0	MAPK3,SOCS3,STAT1,STAT5A
Renal Cell Carcinoma Signaling	2.83	0.0854	#NUM!	HIF1A,MAPK3,PAK1,PDGFB,PIK3CG,SLC2A1,TGFB1
IL-17A Signaling in Gastric Cells	2.8	0.16	#NUM!	CXCL10,CXCL11,MAPK3,TNF
Huntington's Disease Signaling	2.79	0.0535	-0.333	AP2A2,CAPN2,CASP1,CASP4,CASP8,CDK5R1,CREB5,DCTN1,ITPR1,MAPK3,NGF,PIK3CG,TGM2
NAD Biosynthesis III	2.79	0.25	#NUM!	ATP,NAD ,NAMPT
PFKFB4 Signaling Pathway	2.77	0.0968	1.633	ATP,CREB5,FGF2,MAPK3,NCOA3,TGFB1
Relaxin Signaling	2.77	0.0629	0	ATP,MAPK3,MMP9,NFKB2,NFKBIA,NFKBID,NFKBIE,PDE4B,PIK3CG,TDP2
Retinoic acid Mediated Apoptosis Signaling	2.74	0.0952	1.633	CASP8,CFLAR,IFNB1,IFNG,IRF1,PARP14
Cardiac Hypertrophy Signaling	2.7	0.0522	1.387	ATP,EIF4E,IL6,MAP3K1,MAP3K14,MAP3K3,MAP3K8,MAPK3,PIK3CG,RHOC,RHOH,RHOV,TGFB1
Human Embryonic Stem Cell Pluripotency	2.61	0.0643	#NUM!	CTNNB1,FGF2,INHBA,NGF,PDGFA,PDGFB,PIK3CG,S1PR1,TGFB1
TR/RXR Activation	2.57	0.0769	#NUM!	HIF1A,LDLR,NCOA3,PIK3CG,SLC2A1,SREBF1,UCP2
Ceramide Signaling	2.54	0.0761	1.134	MAP3K1,MAPK3,NFKB2,PIK3CG,S1PR1,TNF,TNFRSF1B
Acute Myeloid Leukemia Signaling	2.54	0.0761	0.378	CEBPA,CSF2RB,MAPK3,NFKB2,PIK3CG,PML,STAT5A
Endothelin-1 Signaling	2.52	0.0547	2.714	ATP,CASP1,CASP4,CASP8,ITPR1,MAPK3,PIK3CG,PLA2G5,PTGS1,PTGS2,SHC3
Actin Nucleation by ARP-WASP Complex	2.44	0.0833	0.816	ITGA4,ITGA5,RHOC,RHOH,RHOV,WAS
fMLP Signaling in Neutrophils	2.41	0.065	0	ITPR1,MAPK3,NFKB2,NFKBIA,NFKBID,NFKBIE,PIK3CG,WAS
p53 Signaling	2.39	0.0714	0.816	CTNNB1,GADD45B,HIF1A,JMY,PIK3CG,PML,TP53INP1
Thyroid Cancer Signaling	2.38	0.0962	#NUM!	CDH1,CTNNB1,MAPK3,NGF,PPARG
Iron homeostasis signaling pathway	2.37	0.0592	#NUM!	ATP,CD163,HIF1A,IL6,JAK3,MAPK3,PDGFA,PDGFB,STAT5A
SAPK/JNK Signaling	2.27	0.068	1.89	DUSP4,FCER1G,MAP3K1,MAP3K3,MAP4K4,PIK3CG,TRADD
NRF2-mediated Oxidative Stress Response	2.22	0.0526	0.816	ACTG2,GSTZ1,HERPUD1,JUNB,MAF,MAFF,MAP3K1,MAPK3,PIK3CG,SOD2
B Cell Development	2.21	0.111	#NUM!	CD40,HLA-A,HLA-DMA,IL7R
Amyotrophic Lateral Sclerosis Signaling	2.21	0.066	1.134	BIRC3,CAPN2,CASP1,GRINA,PAK1,PIK3CG,VEGFC
IGF-1 Signaling	2.21	0.066	-0.816	IRS2,MAPK3,PIK3CG,PTK2,SOCS1,SOCS3,YWHAZ
VEGF Signaling	2.21	0.066	0.378	ACTG2,HIF1A,MAPK3,PIK3CG,PTK2,PTPN6,VEGFC
Neurotrophin/TRK Signaling	2.19	0.0741	1.633	CREB5,MAPK3,NGF,PIK3CG,SPRY1,SPRY2
EGF Signaling	2.15	0.0847	1.342	ITPR1,MAP3K1,MAPK3,PIK3CG,STAT1
Chemokine Signaling	2.12	0.0714	1.633	CCL2,CCL4,CXCR4,MAPK3,PIK3CG,PTK2
Inhibition of Angiogenesis by TSP1	2.09	0.103	1	CD47,FYN,MMP9,TGFB1
Glioblastoma Multiforme Signaling	2.06	0.0529	-0.333	CTNNB1,ITPR1,MAPK3,PDGFA,PDGFB,PIK3CG,RHOC,RHOH,RHOV
FAT10 Signaling Pathway	2.06	0.143	#NUM!	ATP,IFNG,TNF
Polyamine Regulation in Colon Cancer	1.95	0.13	#NUM!	CTNNB1,PPARG,SAT1
Apelin Cardiac Fibroblast Signaling Pathway	1.95	0.13	#NUM!	IL6,SERPINE1,TGFB1
Thrombopoietin Signaling	1.92	0.0746	0.447	IRS2,MAPK3,PIK3CG,STAT1,STAT5A
D-myo-inositol (1,3,4)-trisphosphate Biosynthesis	1.9	0.125	#NUM!	ATP,INPP5D,ITPKB
Neuroprotective Role of THOP1 in Alzheimer's Disease	1.89	0.0574	-0.447	ATP,C1R,CFD,HLA-A,IFNG,MMP9,SST
Fatty Acid β-oxidation I	1.87	0.0889	-1	ACSL1,ATP,EHHADH,NAD
Apelin Endothelial Signaling Pathway	1.87	0.0569	1.89	CCL2,HIF1A,ICAM1,MAPK3,NFKB2,PIK3CG,VCAM1
Methylglyoxal Degradation III	1.85	0.12	#NUM!	AKR1B1,Akr1b10,NAD
GP6 Signaling Pathway	1.85	0.0565	2.449	FCER1G,FYN,GRAP2,ITPR1,LYN,PIK3CG,PTK2
TGF-β Signaling	1.85	0.0625	0	ACVR2A,INHBA,IRF7,MAPK3,SERPINE1,TGFB1
Lipid Antigen Presentation by CD1	1.8	0.115	#NUM!	AP2A2,CD3E,FCER1G
1D-myo-inositol Hexakisphosphate Biosynthesis II (Mammalian)	1.8	0.115	#NUM!	ATP,INPP5D,ITPKB
2-ketoglutarate Dehydrogenase Complex	1.77	0.2	#NUM!	DLST,NAD
Acetate Conversion to Acetyl-CoA	1.77	0.2	#NUM!	ACSL1,ATP
ERK5 Signaling	1.77	0.0685	1.342	CREB5,MAP3K3,MAP3K8,NGF,YWHAZ
tRNA Splicing	1.75	0.0816	-1	ATP,NAD ,PDE4B,TDP2
Hypoxia Signaling in the Cardiovascular System	1.74	0.0676	2.236	CREB5,HIF1A,NFKBIA,NFKBID,NFKBIE
Pyridoxal 5'-phosphate Salvage Pathway	1.72	0.0667	-0.447	ACVR2A,ATP,MAP3K8,MAPK3,PAK1
Chronic Myeloid Leukemia Signaling	1.71	0.0583	#NUM!	IKBKB,MAPK3,NFKB2,PIK3CG,STAT5A,TGFB1
Mouse Embryonic Stem Cell Pluripotency	1.71	0.0583	-0.816	CTNNB1,ID1,ID3,JAK3,MAPK3,PIK3CG
Estrogen-Dependent Breast Cancer Signaling	1.66	0.0641	1.342	CREB5,MAPK3,NFKB2,PIK3CG,STAT5A
Tight Junction Signaling	1.64	0.0476	#NUM!	ACTG2,CEBPA,CTNNB1,NFKB2,TGFB1,TJP1,TNF,TNFRSF1B
GDNF Family Ligand-Receptor Interactions	1.63	0.0633	0	DOK3,IRS2,ITPR1,MAPK3,PIK3CG
Oxidative Ethanol Degradation III	1.6	0.0968	#NUM!	ACSL1,ATP,NAD
Superpathway of D-myo-inositol (1,4,5)-trisphosphate Metabolism	1.56	0.0938	#NUM!	ATP,INPP5D,ITPKB
Unfolded protein response	1.56	0.0714	#NUM!	CEBPA,CEBPB,PPARG,SREBF1
CDK5 Signaling	1.55	0.0536	2.236	ATP,CDK5R1,ITGA6,MAPK3,NGF,PPP1R3C
Role of IL-17A in Psoriasis	1.55	0.154	#NUM!	CXCL3,CXCL6
NAD Salvage Pathway III	1.55	0.154	#NUM!	ATP,NAD
NAD biosynthesis II (from tryptophan)	1.53	0.0909	#NUM!	ATP,IDO1,NAD
Putrescine Degradation III	1.53	0.0909	#NUM!	IL4I1,NAD ,SAT1
Salvage Pathways of Pyrimidine Ribonucleotides	1.52	0.0526	-0.816	ACVR2A,APOBEC1,ATP,MAP3K8,MAPK3,PAK1
Phenylalanine Degradation IV (Mammalian, via Side Chain)	1.49	0.0882	#NUM!	ATP,IL4I1,NAD
Ethanol Degradation IV	1.49	0.0882	#NUM!	ACSL1,ATP,NAD
Thrombin Signaling	1.48	0.0421	0.707	IKBKB,ITPR1,MAPK3,NFKB2,PIK3CG,PTK2,RHOC,RHOH,RHOV
Tryptophan Degradation X (Mammalian, via Tryptamine)	1.46	0.0857	#NUM!	Akr1b10,IL4I1,NAD
Prostanoid Biosynthesis	1.43	0.133	#NUM!	PTGS1,PTGS2
Endometrial Cancer Signaling	1.42	0.0645	0	CDH1,CTNNB1,MAPK3,PIK3CG
Mitochondrial Dysfunction	1.39	0.0426	#NUM!	ATP,CASP8,CYC1,NAD ,SOD2,UCP2,UQCRC1,VDAC1
Superpathway of Inositol Phosphate Compounds	1.39	0.0404	1.667	ATP,DUSP2,INPP5D,ITPKB,PDCD1,PIK3CG,PIP5K1B,PTPN6,SOCS3
4-hydroxybenzoate Biosynthesis	1.38	0.125	#NUM!	ATP,NAD
Retinoate Biosynthesis I	1.37	0.0789	#NUM!	AKR1B1,Akr1b10,NAD
ErbB2-ErbB3 Signaling	1.35	0.0615	1	JAK3,MAPK3,PIK3CG,STAT5A
Cancer Drug Resistance By Drug Efflux	1.35	0.0615	#NUM!	ATP,MAPK3,PIK3CG,PTGS2
NAD Biosynthesis from 2-amino-3-carboxymuconate Semialdehyde	1.33	0.118	#NUM!	ATP,NAD
Phosphatidylcholine Biosynthesis I	1.33	0.118	#NUM!	ATP,CHKA
2-oxobutanoate Degradation I	1.33	0.118	#NUM!	ATP,NAD
Melanocyte Development and Pigmentation Signaling	1.32	0.0521	0	ATP,CREB5,MAPK3,PIK3CG,PTPN6
Extrinsic Prothrombin Activation Pathway	1.29	0.111	#NUM!	TFPI,THBD
SPINK1 General Cancer Pathway	1.27	0.058	1	IL6,JAK3,MAPK3,PIK3CG
TCA Cycle II (Eukaryotic)	1.26	0.0714	#NUM!	ATP,DLST,NAD
Ethanol Degradation II	1.26	0.0714	#NUM!	ACSL1,ATP,NAD
Neuregulin Signaling	1.24	0.0495	#NUM!	CDK5R1,ITGA4,ITGA5,MAPK3,STAT5A
Fatty Acid Activation	1.24	0.105	#NUM!	ACSL1,ATP
Ketogenesis	1.24	0.105	#NUM!	HMGCS1,NAD
Phosphatidylethanolamine Biosynthesis II	1.24	0.105	#NUM!	ATP,CHKA
Docosahexaenoic Acid (DHA) Signaling	1.21	0.0682	#NUM!	IL1B,PIK3CG,SERPINF1
NAD Phosphorylation and Dephosphorylation	1.2	0.1	#NUM!	ATP,NAD
Apelin Cardiomyocyte Signaling Pathway	1.2	0.0481	0	HIF1A,ITPR1,MAPK3,PIK3CG,TGFB1
Synaptic Long Term Potentiation	1.2	0.0438	1.633	ATP,CREB5,GRINA,ITPR1,MAPK3,PPP1R3C
P2Y Purigenic Receptor Signaling Pathway	1.2	0.0438	0.447	ATP,CREB5,MAPK3,NFKB2,P2RY2,PIK3CG
BAG2 Signaling Pathway	1.19	0.0667	#NUM!	ATP,MAPK3,NFKB2
Telomerase Signaling	1.16	0.0467	1.342	IL2RA,IL2RB,IL2RG,MAPK3,PIK3CG
Tryptophan Degradation III (Eukaryotic)	1.15	0.0638	#NUM!	EHHADH,IDO1,NAD
3-phosphoinositide Biosynthesis	1.13	0.0393	1.134	ATP,DUSP2,PDCD1,PIK3CG,PIP5K1B,PTPN6,SOCS3
Leptin Signaling in Obesity	1.12	0.0513	#NUM!	ATP,MAPK3,PIK3CG,SOCS3
Role of Wnt/GSK-3β Signaling in the Pathogenesis of Influenza	1.12	0.0513	#NUM!	CTNNB1,IFNB1,IFNG,NCOA3
mTOR Signaling	1.11	0.037	-0.378	EIF4E,HIF1A,MAPK3,PIK3CG,RHOC,RHOH,RHOV,VEGFC
Fatty Acid α-oxidation	1.1	0.087	#NUM!	NAD ,PTGS2
Antiproliferative Role of Somatostatin Receptor 2	1.07	0.0494	0	MAPK3,PIK3CG,PTPN6,SST
GPCR-Mediated Integration of Enteroendocrine Signaling Exemplified by an L Cell	1.07	0.0494	1	ATP,ITPR1,NPY2R,SST
Apelin Adipocyte Signaling Pathway	1.07	0.0494	-1	GPX3,GSTZ1,HIF1A,MAPK3
Role of Lipids/Lipid Rafts in the Pathogenesis of Influenza	1.06	0.0833	#NUM!	IFNB1,IFNG
Tumoricidal Function of Hepatic Natural Killer Cells	1.06	0.0833	#NUM!	CASP8,ICAM1
γ-linolenate Biosynthesis II (Animals)	1.06	0.0833	#NUM!	ACSL1,ATP
Endocannabinoid Developing Neuron Pathway	1.04	0.0431	0.447	CNR2,CREB5,CTNNB1,MAPK3,PIK3CG
Melanoma Signaling	1.04	0.0577	#NUM!	CDH1,MAPK3,PIK3CG
UVB-Induced MAPK Signaling	1.04	0.0577	#NUM!	EIF4E,MAPK3,PIK3CG
Amyloid Processing	1.04	0.0577	#NUM!	CAPN2,CDK5R1,MAPK3
Glutaryl-CoA Degradation	1.03	0.08	#NUM!	EHHADH,NAD
Lysine Degradation V	1.03	0.08	#NUM!	ATP,NAD
Airway Inflammation in Asthma	1.01	0.2	#NUM!	TNF
Thiamin Salvage III	1.01	0.2	#NUM!	ATP
Sorbitol Degradation I	1.01	0.2	#NUM!	NAD
Lipoate Salvage and Modification	1.01	0.2	#NUM!	ATP
Adenine and Adenosine Salvage VI	1.01	0.2	#NUM!	ATP
Antiproliferative Role of TOB in T Cell Signaling	1.01	0.0769	#NUM!	CCNA2,TGFB1
Leucine Degradation I	1.01	0.0769	#NUM!	ATP,NAD
AMPK Signaling	1	0.0349	0.707	CCNA2,CREB5,IRS2,NAD ,PCK2,PFKFB3,PIK3CG,SLC2A1
cAMP-mediated signaling	0.983	0.0346	0.707	ATP,CNR2,CREB5,DUSP4,MAPK3,PDE4B,S1PR1,TDP2
Mevalonate Pathway I	0.979	0.0741	#NUM!	ATP,HMGCS1
Folate Transformations I	0.951	0.0714	#NUM!	ATP,NAD
VEGF Family Ligand-Receptor Interactions	0.943	0.0444	1	MAPK3,PIK3CG,PLA2G5,VEGFC
RhoA Signaling	0.939	0.04	-1.342	ACTG2,CDC42EP4,EZR,PIP5K1B,PTK2
Melatonin Degradation III	0.932	0.167	#NUM!	MPO
3-phosphoinositide Degradation	0.932	0.037	2.449	DUSP2,INPP5D,MTMR14,PDCD1,PTPN6,SOCS3
Glycine Biosynthesis II	0.932	0.167	#NUM!	NAD
Fatty Acid β-oxidation III (Unsaturated, Odd Number)	0.932	0.167	#NUM!	EHHADH
Protein Ubiquitination Pathway	0.928	0.0325	#NUM!	ATP,BIRC3,CBL,HLA-A,IFNG,PSMA1,PSMB9,TAP1,UCHL3
Isoleucine Degradation I	0.924	0.069	#NUM!	EHHADH,NAD
Gαi Signaling	0.91	0.0391	1	ATP,CNR2,MAPK3,RALGDS,S1PR1
CNTF Signaling	0.903	0.05	#NUM!	MAPK3,PIK3CG,STAT1
14-3-3-mediated Signaling	0.9	0.0388	0	CBL,MAPK3,PIK3CG,TNF,YWHAZ
CCR3 Signaling in Eosinophils	0.9	0.0388	1	ITPR1,MAPK3,PAK1,PIK3CG,PLA2G5
Glutathione Redox Reactions I	0.879	0.0645	#NUM!	GPX3,GSTZ1
Histamine Degradation	0.879	0.0645	#NUM!	ATP,NAD
UDP-D-xylose and UDP-D-glucuronate Biosynthesis	0.87	0.143	#NUM!	NAD
Choline Degradation I	0.87	0.143	#NUM!	NAD
Glutamine Biosynthesis I	0.87	0.143	#NUM!	ATP
Glycerol-3-phosphate Shuttle	0.87	0.143	#NUM!	NAD
The Visual Cycle	0.857	0.0625	#NUM!	Akr1b10,NAD
eNOS Signaling	0.845	0.0349	2	ATP,CASP8,CCNA2,ITPR1,PIK3CG,VEGFC
Gap Junction Signaling	0.842	0.0332	#NUM!	ACTG2,ATP,CTNNB1,ITPR1,MAPK3,PIK3CG,TJP1
p70S6K Signaling	0.839	0.037	1	IL2RG,LYN,MAPK3,PIK3CG,YWHAZ
CCR5 Signaling in Macrophages	0.836	0.0404	#NUM!	CCL4,CD247,CD3E,FCER1G
UVA-Induced MAPK Signaling	0.836	0.0404	#NUM!	MAPK3,PARP14,PIK3CG,STAT1
Myc Mediated Apoptosis Signaling	0.827	0.0462	#NUM!	CASP8,PIK3CG,YWHAZ
Wnt/β-catenin Signaling	0.827	0.0345	0.447	ACVR2A,CD44,CDH1,CTNNB1,MMP7,TGFB1
Mitotic Roles of Polo-Like Kinase	0.815	0.0455	#NUM!	PLK3,STAG2,TGFB1
Retinoate Biosynthesis II	0.815	0.125	#NUM!	NAD
Trehalose Degradation II (Trehalase)	0.815	0.125	#NUM!	ATP
PRPP Biosynthesis I	0.815	0.125	#NUM!	ATP
NADH Repair	0.815	0.125	#NUM!	ATP
Proline Degradation	0.815	0.125	#NUM!	NAD
Acetyl-CoA Biosynthesis III (from Citrate)	0.815	0.125	#NUM!	ATP
Taurine Biosynthesis	0.815	0.125	#NUM!	NAD
Flavin Biosynthesis IV (Mammalian)	0.815	0.125	#NUM!	ATP
GDP-L-fucose Biosynthesis II (from L-fucose)	0.815	0.125	#NUM!	ATP
Sulfate Activation for Sulfonation	0.815	0.125	#NUM!	ATP
Asparagine Biosynthesis I	0.815	0.125	#NUM!	ATP
Citrulline Degradation	0.815	0.125	#NUM!	ATP
S-adenosyl-L-methionine Biosynthesis	0.815	0.125	#NUM!	ATP
Circadian Rhythm Signaling	0.793	0.0571	#NUM!	CREB5,GRINA
NAD Salvage Pathway II	0.793	0.0571	#NUM!	ATP,NAD
D-myo-inositol (1,4,5)-Trisphosphate Biosynthesis	0.793	0.0571	#NUM!	ATP,PIP5K1B
Valine Degradation I	0.793	0.0571	#NUM!	EHHADH,NAD
Superpathway of Geranylgeranyldiphosphate Biosynthesis I (via Mevalonate)	0.793	0.0571	#NUM!	ATP,HMGCS1
Colanic Acid Building Blocks Biosynthesis	0.775	0.0556	#NUM!	ATP,NAD
Remodeling of Epithelial Adherens Junctions	0.775	0.0435	#NUM!	ACTG2,CDH1,CTNNB1
Endocannabinoid Neuronal Synapse Pathway	0.775	0.0352	1.342	CNR2,GRINA,ITPR1,MAPK3,PTGS2
Neuropathic Pain Signaling In Dorsal Horn Neurons	0.772	0.0381	1	GRINA,ITPR1,MAPK3,PIK3CG
Role of NFAT in Cardiac Hypertrophy	0.77	0.0317	1.89	ATP,IL6,ITPR1,MAP3K1,MAPK3,PIK3CG,TGFB1
Epoxysqualene Biosynthesis	0.77	0.111	#NUM!	SQLE
Branched-chain α-keto acid Dehydrogenase Complex	0.77	0.111	#NUM!	NAD
Methionine Salvage II (Mammalian)	0.77	0.111	#NUM!	BHMT2
Threonine Degradation II	0.77	0.111	#NUM!	NAD
Methylglyoxal Degradation VI	0.77	0.111	#NUM!	NAD
1D-myo-inositol Hexakisphosphate Biosynthesis V (from Ins(1,3,4)P3)	0.77	0.111	#NUM!	ATP
White Adipose Tissue Browning Pathway	0.767	0.035	1.342	CAMP,CEBPB,CREB5,FCER1G,PPARG
PXR/RXR Activation	0.762	0.0429	#NUM!	IL6,PCK2,TNF
Superpathway of Methionine Degradation	0.75	0.0423	#NUM!	ATP,BHMT2,NAD
EIF2 Signaling	0.73	0.0308	-0.447	ACTG2,ATF3,EIF4E,MAPK3,PIK3CG,SREBF1,WARS
β-alanine Degradation I	0.728	0.1	#NUM!	NAD
Pyruvate Fermentation to Lactate	0.728	0.1	#NUM!	NAD
Lipoate Biosynthesis and Incorporation II	0.728	0.1	#NUM!	ATP
Superoxide Radicals Degradation	0.728	0.1	#NUM!	SOD2
2-amino-3-carboxymuconate Semialdehyde Degradation to Glutaryl-CoA	0.728	0.1	#NUM!	NAD
4-aminobutyrate Degradation I	0.728	0.1	#NUM!	NAD
D-myo-inositol (1,4,5,6)-Tetrakisphosphate Biosynthesis	0.726	0.0338	1.342	ATP,DUSP2,PDCD1,PTPN6,SOCS3
D-myo-inositol (3,4,5,6)-tetrakisphosphate Biosynthesis	0.726	0.0338	1.342	ATP,DUSP2,PDCD1,PTPN6,SOCS3
Gαs Signaling	0.712	0.036	1	ATP,CREB5,HCK,MAPK3
Nitric Oxide Signaling in the Cardiovascular System	0.703	0.0357	1	ITPR1,MAPK3,PIK3CG,VEGFC
Phenylethylamine Degradation I	0.69	0.0909	#NUM!	NAD
Glutathione Biosynthesis	0.69	0.0909	#NUM!	ATP
D-glucuronate Degradation I	0.69	0.0909	#NUM!	NAD
4-hydroxyproline Degradation I	0.69	0.0909	#NUM!	NAD
L-glutamine Biosynthesis II (tRNA-dependent)	0.69	0.0909	#NUM!	ATP
Phenylalanine Degradation I (Aerobic)	0.69	0.0909	#NUM!	NAD
Purine Nucleotides De Novo Biosynthesis II	0.688	0.0488	#NUM!	ATP,NAD
Corticotropin Releasing Hormone Signaling	0.672	0.0323	#NUM!	ATP,CREB5,ITPR1,MAPK3,PTGS2
Glycolysis I	0.672	0.0476	#NUM!	ATP,NAD
Epithelial Adherens Junction Signaling	0.672	0.0323	#NUM!	ACTG2,ACVR2A,CDH1,CTNNB1,WAS
FcγRIIB Signaling in B Lymphocytes	0.658	0.038	#NUM!	INPP5D,LYN,PIK3CG
Non-Small Cell Lung Cancer Signaling	0.658	0.038	#NUM!	ITPR1,MAPK3,PIK3CG
Diphthamide Biosynthesis	0.658	0.0833	#NUM!	ATP
Acetyl-CoA Biosynthesis I (Pyruvate Dehydrogenase Complex)	0.658	0.0833	#NUM!	NAD
Methylmalonyl Pathway	0.658	0.0833	#NUM!	ATP
Ascorbate Recycling (Cytosolic)	0.658	0.0833	#NUM!	NAD
Biotin-carboxyl Carrier Protein Assembly	0.658	0.0833	#NUM!	ATP
Melatonin Degradation II	0.658	0.0833	#NUM!	IL4I1
N-acetylglucosamine Degradation II	0.658	0.0833	#NUM!	ATP
Glutamate Degradation III (via 4-aminobutyrate)	0.658	0.0833	#NUM!	NAD
Glioma Signaling	0.65	0.0339	0	MAPK3,PDGFA,PDGFB,PIK3CG
Role of NANOG in Mammalian Embryonic Stem Cell Pluripotency	0.642	0.0336	0	CTNNB1,JAK3,MAPK3,PIK3CG
Dopamine Degradation	0.642	0.0455	#NUM!	IL4I1,NAD
Oxidative Phosphorylation	0.642	0.0336	0	ATP,CYC1,NAD ,UQCRC1
Apelin Pancreas Signaling Pathway	0.629	0.0444	#NUM!	NFKB2,PIK3CG
Regulation of eIF4 and p70S6K Signaling	0.627	0.0311	1	EIF4E,ITGA4,ITGA5,MAPK3,PIK3CG
Assembly of RNA Polymerase III Complex	0.627	0.0769	#NUM!	BRF1
L-carnitine Biosynthesis	0.627	0.0769	#NUM!	NAD
L-DOPA Degradation	0.627	0.0769	#NUM!	NAD
Glycerol Degradation I	0.627	0.0769	#NUM!	ATP
Glycine Cleavage Complex	0.627	0.0769	#NUM!	NAD
Ceramide Degradation	0.627	0.0769	#NUM!	ATP
Arginine Degradation I (Arginase Pathway)	0.627	0.0769	#NUM!	NAD
Gustation Pathway	0.627	0.0311	#NUM!	ATP,ITPR1,P2RY2,PDE4B,TDP2
Eicosanoid Signaling	0.625	0.0366	#NUM!	PLA2G5,PTGS1,PTGS2
D-myo-inositol-5-phosphate Metabolism	0.614	0.0307	1.342	ATP,DUSP2,PDCD1,PTPN6,SOCS3
Breast Cancer Regulation by Stathmin1	0.604	0.0291	#NUM!	ATP,ITPR1,MAPK3,PAK1,PIK3CG,PPP1R3C
Gluconeogenesis I	0.6	0.0426	#NUM!	ATP,NAD
Serine Biosynthesis	0.599	0.0714	#NUM!	NAD
Spermine and Spermidine Degradation I	0.599	0.0714	#NUM!	SAT1
Coenzyme A Biosynthesis	0.599	0.0714	#NUM!	ATP
Calcium Transport I	0.599	0.0714	#NUM!	ATP
Proline Biosynthesis I	0.599	0.0714	#NUM!	ATP
Galactose Degradation I (Leloir Pathway)	0.599	0.0714	#NUM!	ATP
Tyrosine Degradation I	0.599	0.0714	#NUM!	GSTZ1
Aspartate Degradation II	0.599	0.0714	#NUM!	NAD
Molybdenum Cofactor Biosynthesis	0.599	0.0714	#NUM!	ATP
Superpathway of Cholesterol Biosynthesis	0.597	0.0353	#NUM!	ATP,HMGCS1,SQLE
HIPPO signaling	0.587	0.0349	#NUM!	CD44,PPP1R3C,YWHAZ
Inositol Pyrophosphates Biosynthesis	0.573	0.0667	#NUM!	ATP
Calcium Signaling	0.559	0.028	1.342	ATP,CREB5,GRINA,ITPR1,MAPK3,Tpm1
Dermatan Sulfate Biosynthesis (Late Stages)	0.551	0.0392	#NUM!	CHST1,NDST2
Granzyme B Signaling	0.55	0.0625	#NUM!	CASP8
Selenocysteine Biosynthesis II (Archaea and Eukaryotes)	0.55	0.0625	#NUM!	ATP
Inosine-5'-phosphate Biosynthesis II	0.55	0.0625	#NUM!	ATP
Citrulline-Nitric Oxide Cycle	0.55	0.0625	#NUM!	ATP
GDP-glucose Biosynthesis	0.55	0.0625	#NUM!	ATP
G Beta Gamma Signaling	0.544	0.0303	1	ATP,MAPK3,PAK1,PIK3CG
Dopamine Receptor Signaling	0.542	0.033	#NUM!	ATP,IL4I1,PPP1R3C
nNOS Signaling in Neurons	0.539	0.0385	#NUM!	CAPN2,GRINA
Noradrenaline and Adrenaline Degradation	0.539	0.0385	#NUM!	IL4I1,NAD
Pyrimidine Ribonucleotides Interconversion	0.529	0.0377	#NUM!	ATP,RECQL
CMP-N-acetylneuraminate Biosynthesis I (Eukaryotes)	0.527	0.0588	#NUM!	ATP
Tryptophan Degradation to 2-amino-3-carboxymuconate Semialdehyde	0.527	0.0588	#NUM!	IDO1
Factors Promoting Cardiogenesis in Vertebrates	0.526	0.0323	#NUM!	ACVR2A,CTNNB1,TGFB1
Dopamine-DARPP32 Feedback in cAMP Signaling	0.526	0.0282	2.236	ATP,CREB5,GRINA,ITPR1,PPP1R3C
ErbB Signaling	0.519	0.0319	#NUM!	MAPK3,PAK1,PIK3CG
Bile Acid Biosynthesis, Neutral Pathway	0.517	0.037	#NUM!	ATP,NAD
Estrogen Receptor Signaling	0.51	0.0292	#NUM!	MAPK3,NCOA3,PCK2,PHB2
Mismatch Repair in Eukaryotes	0.507	0.0556	#NUM!	ATP
Sphingosine and Sphingosine-1-phosphate Metabolism	0.507	0.0556	#NUM!	ATP
5-aminoimidazole Ribonucleotide Biosynthesis I	0.507	0.0556	#NUM!	ATP
Ketolysis	0.507	0.0556	#NUM!	NAD
Folate Polyglutamylation	0.507	0.0556	#NUM!	ATP
ATM Signaling	0.495	0.0309	#NUM!	CREB5,GADD45B,NFKBIA
RAN Signaling	0.488	0.0526	#NUM!	RANBP1
GADD45 Signaling	0.488	0.0526	#NUM!	GADD45B
Superpathway of Serine and Glycine Biosynthesis I	0.488	0.0526	#NUM!	NAD
Sucrose Degradation V (Mammalian)	0.488	0.0526	#NUM!	ATP
Lysine Degradation II	0.488	0.0526	#NUM!	NAD
Uridine-5'-phosphate Biosynthesis	0.488	0.0526	#NUM!	ATP
Chondroitin Sulfate Biosynthesis (Late Stages)	0.485	0.0351	#NUM!	CHST1,NDST2
Granzyme A Signaling	0.47	0.05	#NUM!	H1F0
Glucose and Glucose-1-phosphate Degradation	0.47	0.05	#NUM!	ATP
Urea Cycle	0.47	0.05	#NUM!	ATP
Salvage Pathways of Pyrimidine Deoxyribonucleotides	0.47	0.05	#NUM!	ATP
Cellular Effects of Sildenafil (Viagra)	0.466	0.0278	#NUM!	ACTG2,ATP,ITPR1,PDE4B
Stearate Biosynthesis I (Animals)	0.466	0.0339	#NUM!	ACSL1,ATP
SPINK1 Pancreatic Cancer Pathway	0.457	0.0333	#NUM!	CPA5,TGFB1
Mitochondrial L-carnitine Shuttle Pathway	0.452	0.0476	#NUM!	ACSL1
Glucocorticoid Biosynthesis	0.452	0.0476	#NUM!	NAD
Mineralocorticoid Biosynthesis	0.452	0.0476	#NUM!	NAD
Cardiac β-adrenergic Signaling	0.444	0.027	1	ATP,PDE4B,PPP1R3C,TDP2
α-Adrenergic Signaling	0.438	0.0286	#NUM!	ATP,ITPR1,MAPK3
Urate Biosynthesis/Inosine 5'-phosphate Degradation	0.437	0.0455	#NUM!	NAD
D-myo-inositol (1,4,5)-trisphosphate Degradation	0.437	0.0455	#NUM!	INPP5D
Guanosine Nucleotides Degradation III	0.437	0.0455	#NUM!	NAD
Glycine Betaine Degradation	0.421	0.0435	#NUM!	BHMT2
Vitamin-C Transport	0.421	0.0435	#NUM!	SLC2A1
Wnt/Ca+ pathway	0.413	0.0308	#NUM!	CREB5,NFKB2
Arginine Biosynthesis IV	0.407	0.0417	#NUM!	ATP
γ-glutamyl Cycle	0.407	0.0417	#NUM!	ATP
UDP-N-acetyl-D-galactosamine Biosynthesis II	0.407	0.0417	#NUM!	ATP
Pyrimidine Ribonucleotides De Novo Biosynthesis	0.406	0.0303	#NUM!	ATP,RECQL
Maturity Onset Diabetes of Young (MODY) Signaling	0.394	0.04	#NUM!	ATP
Estrogen-mediated S-phase Entry	0.38	0.0385	#NUM!	CCNA2
Androgen Biosynthesis	0.38	0.0385	#NUM!	NAD
Adenosine Nucleotides Degradation II	0.38	0.0385	#NUM!	NAD
Apelin Liver Signaling Pathway	0.38	0.0385	#NUM!	TNF
ErbB4 Signaling	0.375	0.0286	#NUM!	MAPK3,PIK3CG
Citrulline Biosynthesis	0.368	0.037	#NUM!	ATP
Chondroitin Sulfate Biosynthesis	0.361	0.0278	#NUM!	CHST1,NDST2
Dermatan Sulfate Biosynthesis	0.347	0.027	#NUM!	CHST1,NDST2
CREB Signaling in Neurons	0.346	0.0233	1.342	ATP,CREB5,ITPR1,MAPK3,PIK3CG
Role of p14/p19ARF in Tumor Suppression	0.345	0.0345	#NUM!	PIK3CG
Aldosterone Signaling in Epithelial Cells	0.344	0.0238	0	ITPR1,MAPK3,PIK3CG,PIP5K1B
Methionine Degradation I (to Homocysteine)	0.334	0.0333	#NUM!	ATP
Role of BRCA1 in DNA Damage Response	0.31	0.025	#NUM!	IFNG,STAT1
Cyclins and Cell Cycle Regulation	0.304	0.0247	#NUM!	CCNA2,TGFB1
tRNA Charging	0.298	0.0244	#NUM!	ATP,WARS
DNA Methylation and Transcriptional Repression Signaling	0.296	0.0294	#NUM!	MBD2
HER-2 Signaling in Breast Cancer	0.287	0.0238	#NUM!	ITGB2,PIK3CG
Purine Nucleotides Degradation II (Aerobic)	0.287	0.0286	#NUM!	NAD
Serotonin Degradation	0.287	0.0238	#NUM!	IL4I1,NAD
Heparan Sulfate Biosynthesis (Late Stages)	0.281	0.0235	#NUM!	CHST1,NDST2
Superpathway of Melatonin Degradation	0.277	0.0233	#NUM!	IL4I1,MPO
BMP signaling pathway	0.277	0.0233	#NUM!	MAPK3,NFKB2
Cell Cycle Regulation by BTG Family Proteins	0.271	0.027	#NUM!	BTG2
Cysteine Biosynthesis III (mammalia)	0.271	0.027	#NUM!	ATP
Notch Signaling	0.264	0.0263	#NUM!	JAG1
Superpathway of Citrulline Metabolism	0.256	0.0256	#NUM!	ATP
Pyrimidine Deoxyribonucleotides De Novo Biosynthesis I	0.249	0.025	#NUM!	ATP
Cholesterol Biosynthesis I	0.249	0.025	#NUM!	SQLE
Cholesterol Biosynthesis II (via 24,25-dihydrolanosterol)	0.249	0.025	#NUM!	SQLE
Cholesterol Biosynthesis III (via Desmosterol)	0.249	0.025	#NUM!	SQLE
Mechanisms of Viral Exit from Host Cells	0.242	0.0244	#NUM!	ACTG2
Heparan Sulfate Biosynthesis	0.23	0.0208	#NUM!	CHST1,NDST2
Intrinsic Prothrombin Activation Pathway	0.229	0.0233	#NUM!	THBD
Glutathione-mediated Detoxification	0.223	0.0227	#NUM!	GSTZ1
Synaptic Long Term Depression	0	0.0204	1	ITPR1,LYN,MAPK3,PLA2G5
Melatonin Signaling	0	0.0128	#NUM!	MAPK3
Androgen Signaling	0	0.0144	#NUM!	MAPK3,NFKB2
Basal Cell Carcinoma Signaling	0	0.0135	#NUM!	CTNNB1
Hereditary Breast Cancer Signaling	0	0.0141	#NUM!	GADD45B,PIK3CG
Cell Cycle Control of Chromosomal Replication	0	0.0179	#NUM!	MCM7
Transcriptional Regulatory Network in Embryonic Stem Cells	0	0.0185	#NUM!	SKIL
Triacylglycerol Degradation	0	0.0172	#NUM!	NDST2
Phospholipases	0	0.0141	#NUM!	PLA2G5
Retinol Biosynthesis	0	0.0196	#NUM!	Akr1b10
UVC-Induced MAPK Signaling	0	0.0196	#NUM!	MAPK3
PCP pathway	0	0.0164	#NUM!	JUNB
Cell Cycle: G1/S Checkpoint Regulation	0	0.0149	#NUM!	TGFB1
Cell Cycle: G2/M DNA Damage Checkpoint Regulation	0	0.0204	#NUM!	YWHAZ
GABA Receptor Signaling	0	0.0099	#NUM!	AP2A2
Serotonin Receptor Signaling	0	0.0189	#NUM!	IL4I1
Glutamate Receptor Signaling	0	0.0156	#NUM!	GRINA
GPCR-Mediated Nutrient Sensing in Enteroendocrine Cells	0	0.0168	#NUM!	ATP,ITPR1
Phagosome Maturation	0	0.0191	#NUM!	HLA-A,MPO,TAP1
NER Pathway	0	0.00935	#NUM!	ATP
